# Supplementary material for: Alkali metal salts of a tetracyanopyridine (TCPy) derivative: structure characterization and luminescence properties
Source: Royal Society of Chemistry journal article supplement (doi:10.1039/d1ce00028d), 2021-01-01
Supplement: d1ce00028d1.pdf [file d1ce00028d1.pdf]

## Supporting Information

### **Alkali Metals salts of a Tetracyanopyridine (TCPy) Derivative: Structure Characterization and Luminescence Properties**

Sergey S. Chunikhin,<sup>a</sup> Oleg V. Ershov,<sup>\*a</sup> Alexandr V. Yatsenko,<sup>b</sup>  
Viktor A. Tafeenko,<sup>b</sup> Natalia E. Dmitrieva,<sup>b</sup> Mikhail Yu. Ievlev<sup>a</sup>

*\*E-mail: [oleg.ershov@mail.ru](mailto:oleg.ershov@mail.ru)*

*<sup>a</sup>Ulyanov Chuvash State University, Moskovsky pr., 15, Cheboksary,  
428015, Russia.*

*<sup>b</sup>Lomonosov Moscow State University, Leninskie Gory 1, Moscow, Russia*

|    |                                      |    |
|----|--------------------------------------|----|
| 1. | <b>Photoluminescence spectra</b>     | 2  |
| 2. | <b>Absorption spectra</b>            | 5  |
| 3. | <b>XRD data</b>                      | 8  |
| 4. | <b>Quantum chemical calculations</b> | 11 |
| 5. | <b>Experimental</b>                  | 18 |
| 6. | <b>NMR spectra</b>                   | 20 |

## 1. Photoluminescence spectra

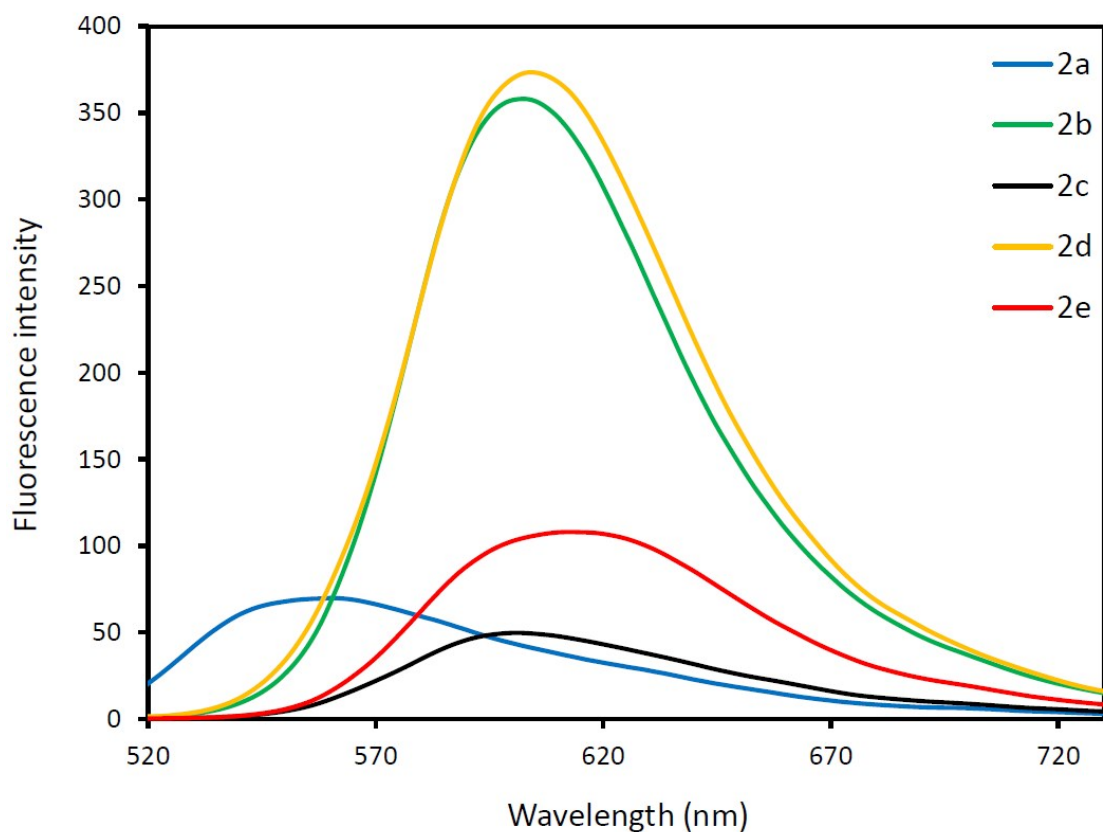

**Figure S1** Solid-state emission of compounds **2a-e** (excitation wavelength 350 nm).

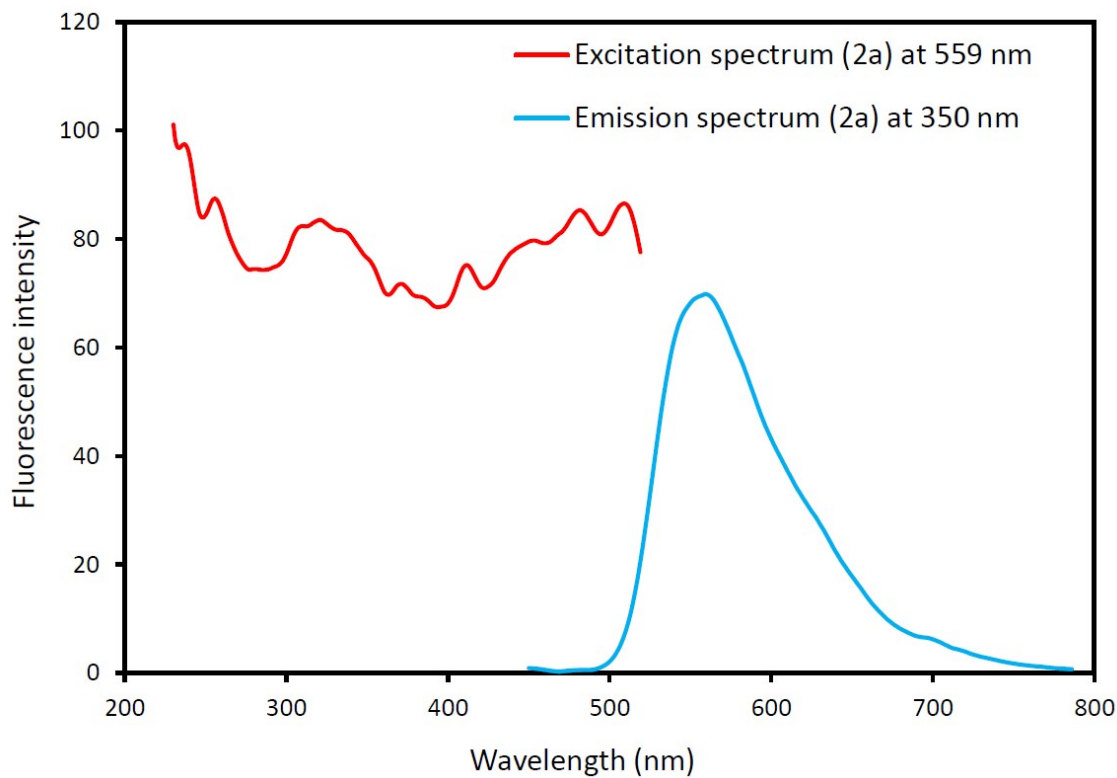

**Figure S2** Excitation and emission spectra of compound **2a** in the solid state.

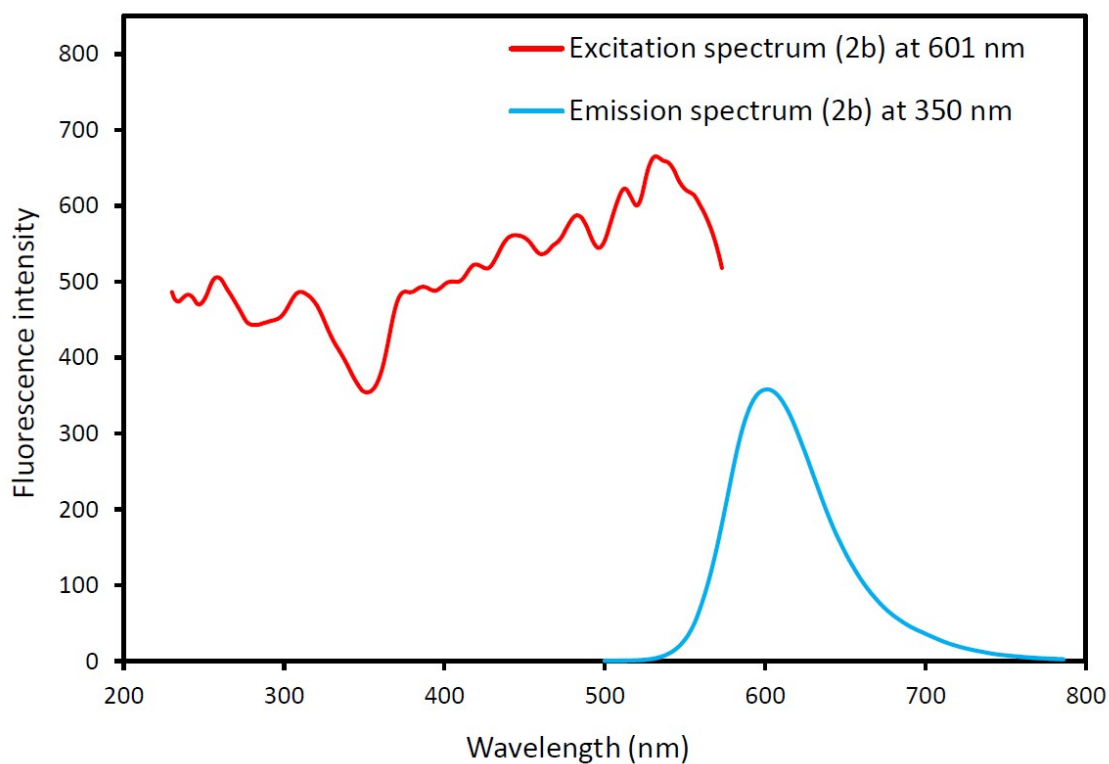

**Figure S3** Excitation and emission spectra of compound **2b** in the solid state.

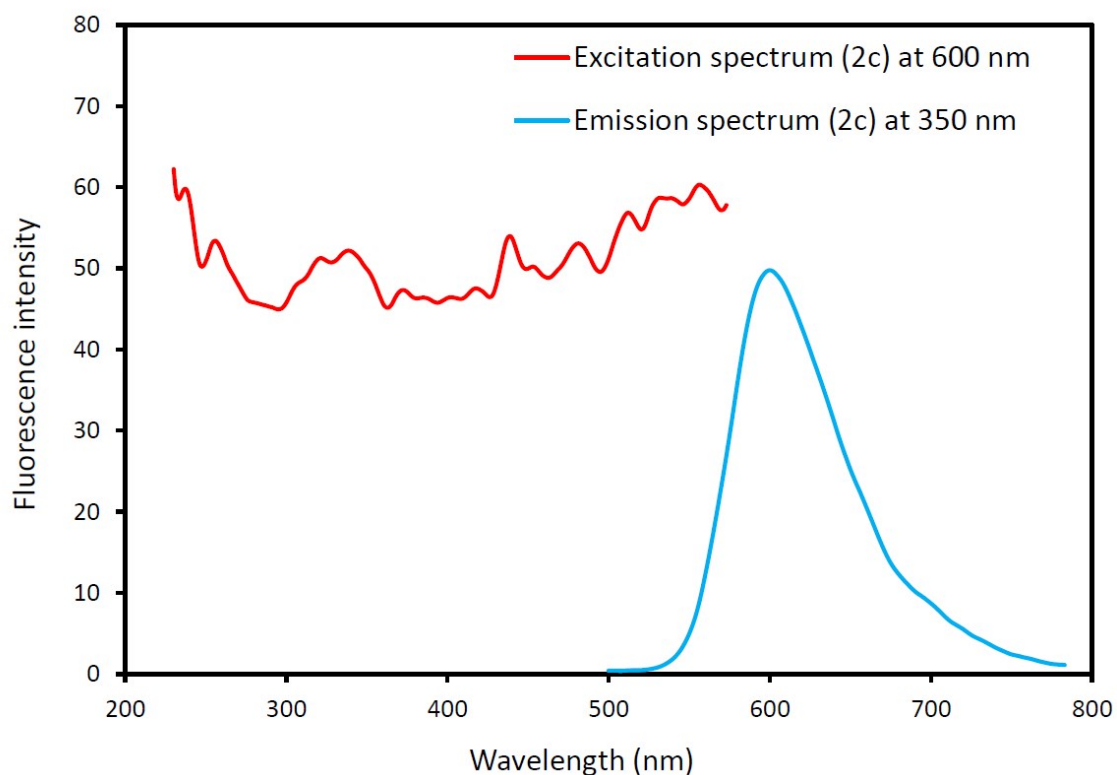

**Figure S4** Excitation and emission spectra of compound **2c** in the solid state.

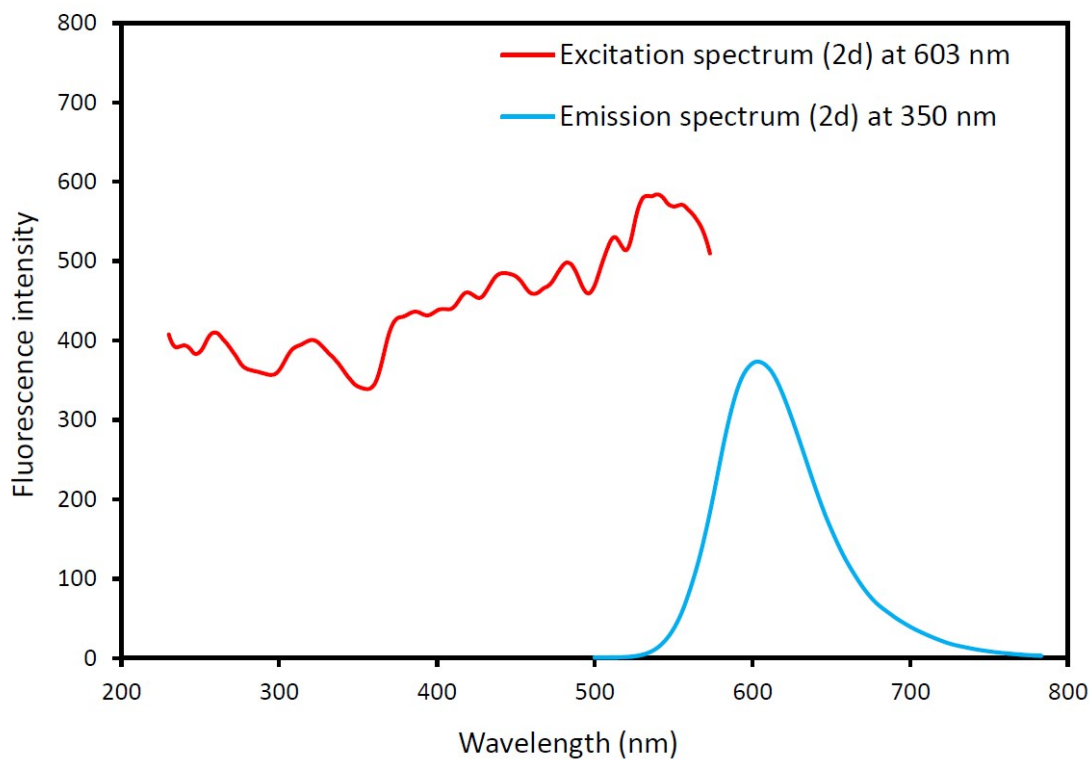

**Figure S5** Excitation and emission spectra of compound **2d** in the solid state.

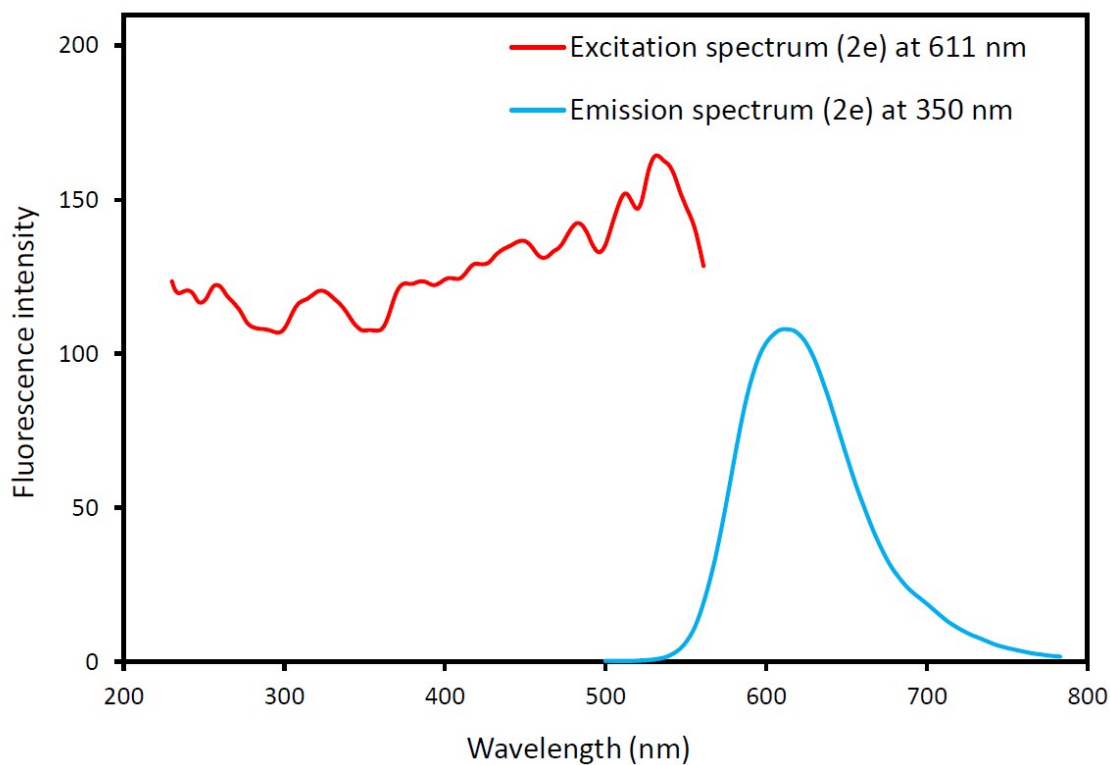

**Figure S6** Excitation and emission spectra of compound **2e** in the solid state.

## 2. Absorption spectra

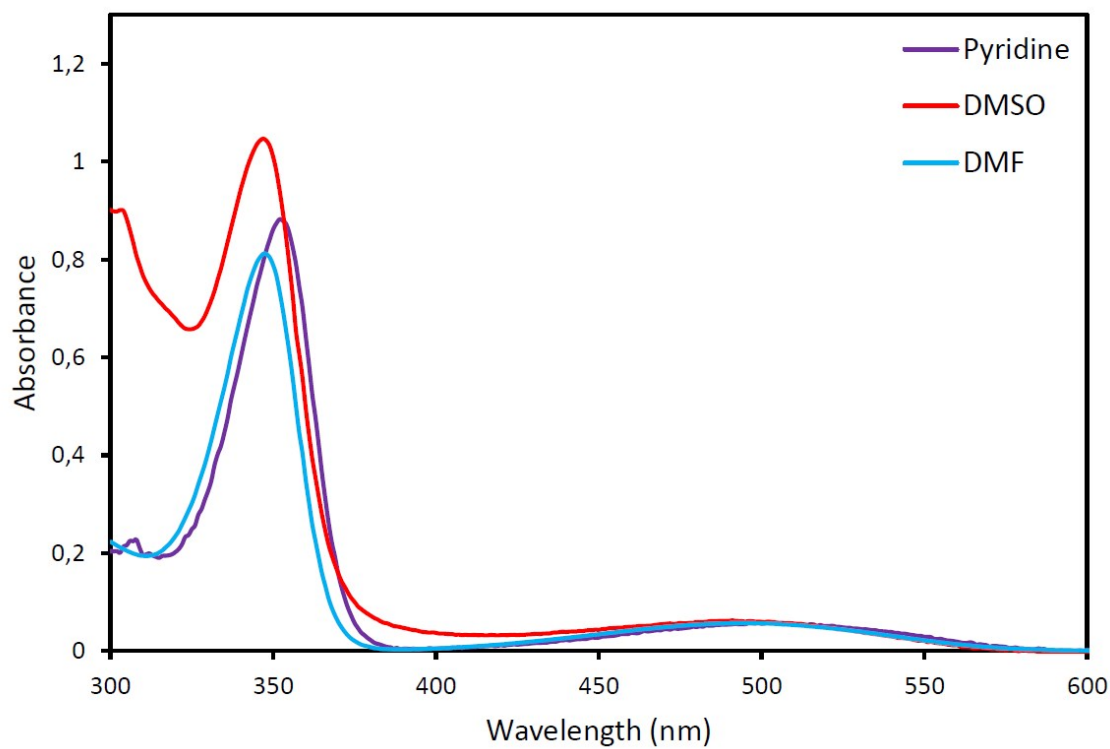

**Figure S7** Absorption spectra of compound **2a** in different solvents.

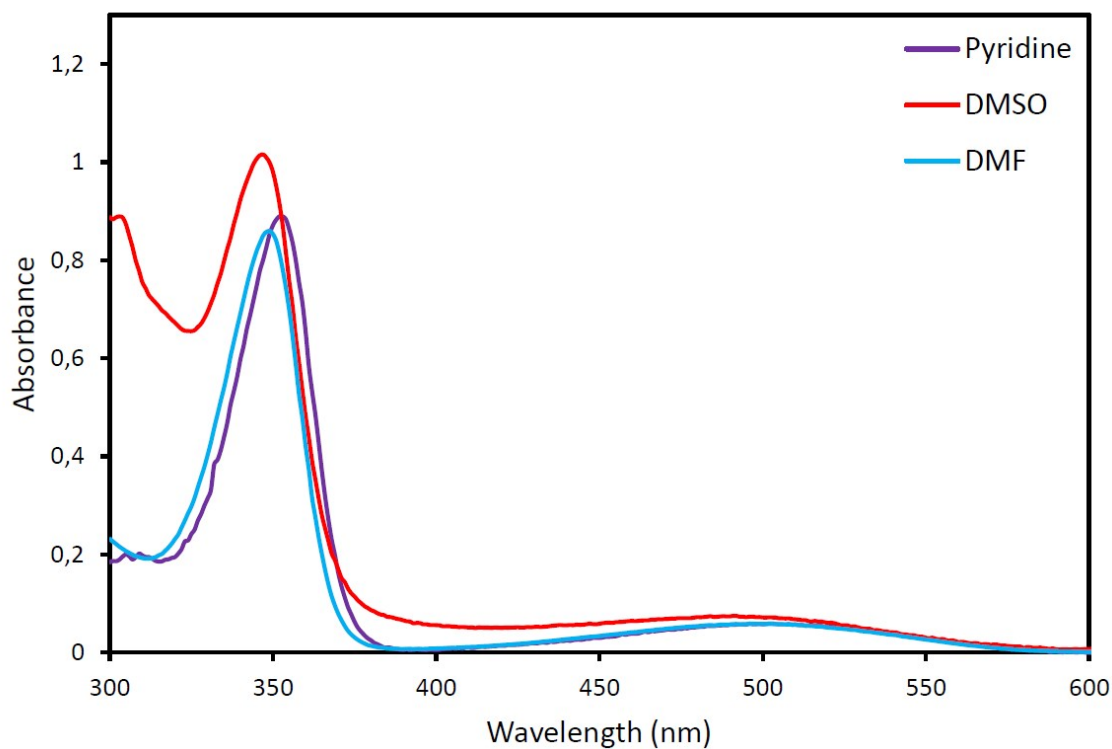

**Figure S8** Absorption spectra of compound **2b** in different solvents.

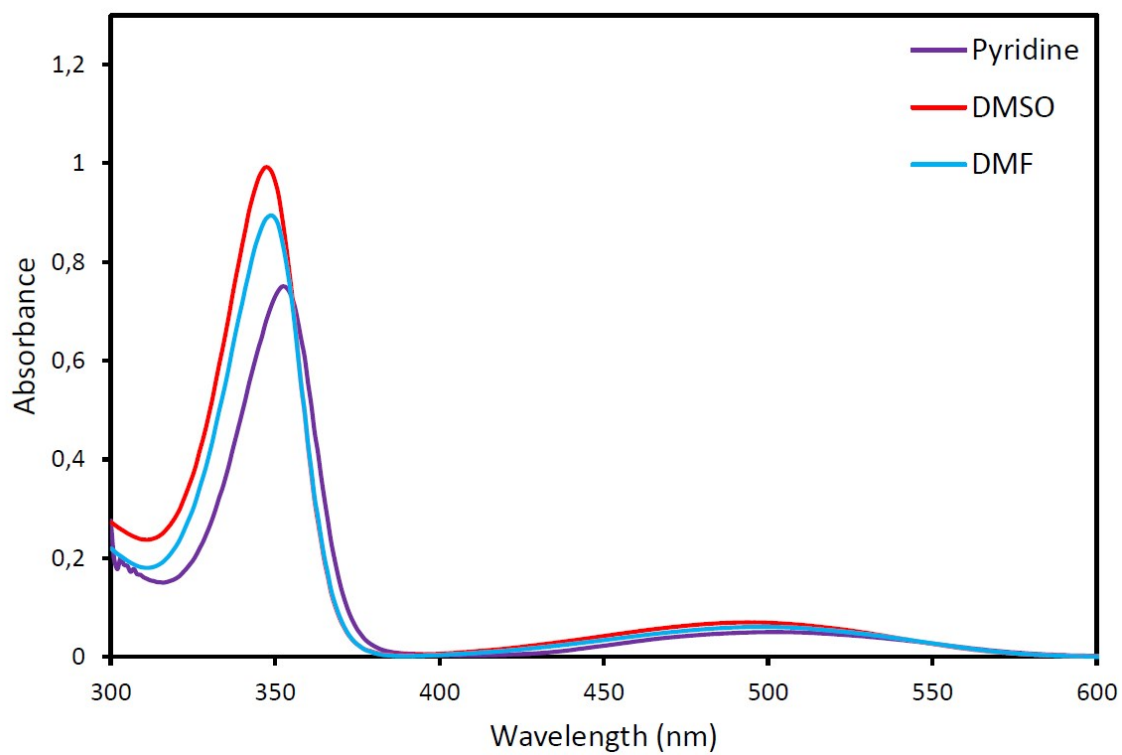

**Figure S9** Absorption spectra of compound **2c** in different solvents.

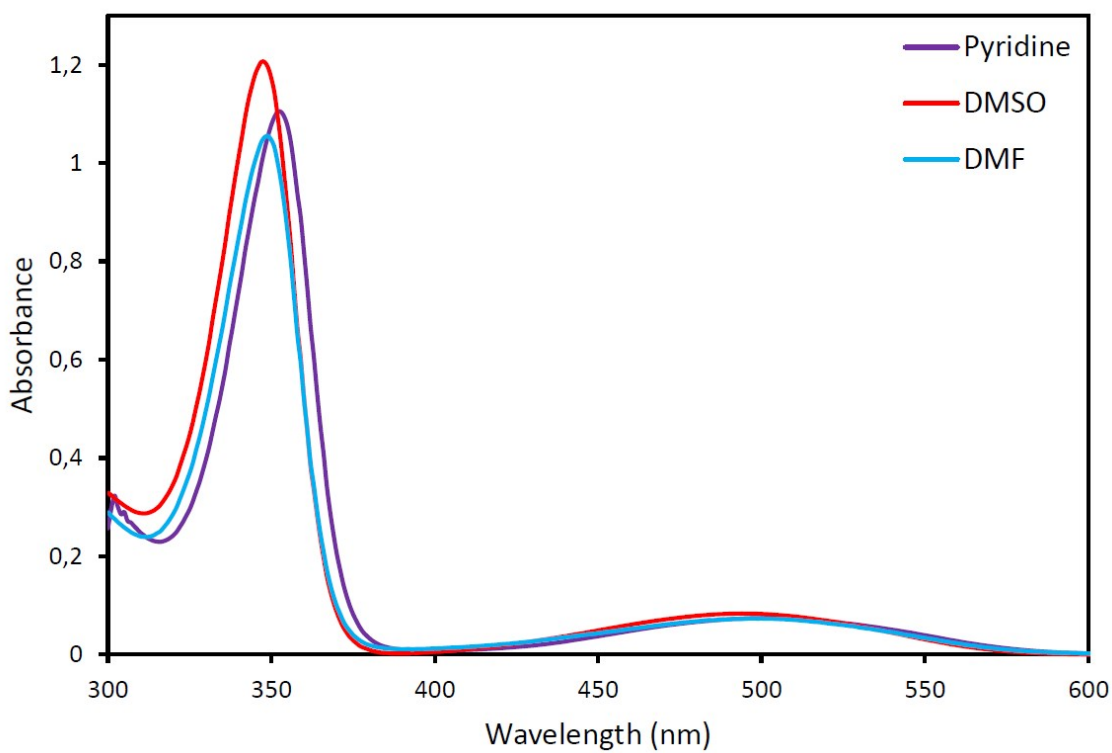

**Figure S10** Absorption spectra of compound **2d** in different solvents.

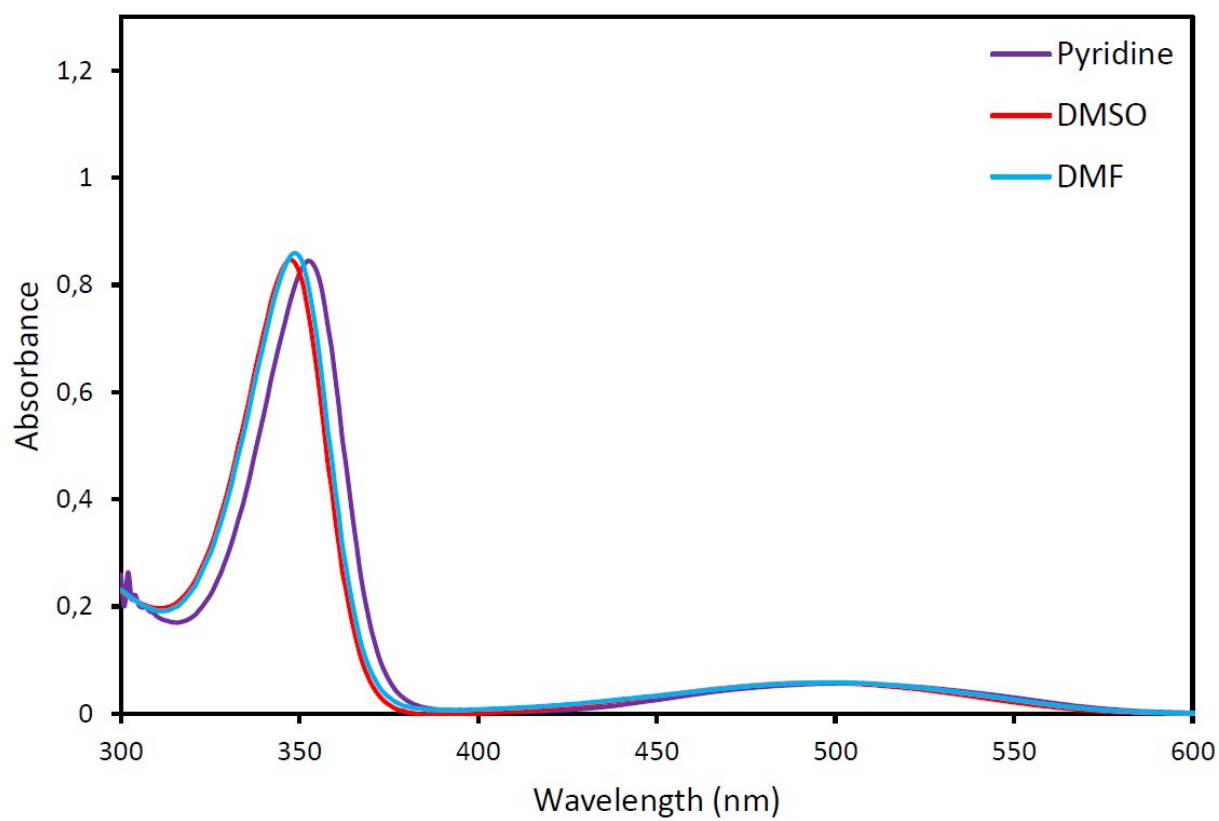

**Figure S11** Absorption spectra of compound **2e** in different solvents.

### 3. XRD data

Crystals of each salt that were suitable for X-ray diffraction study were obtained by slow evaporation of a solution of the appropriate salt in acetonitrile at room temperature.

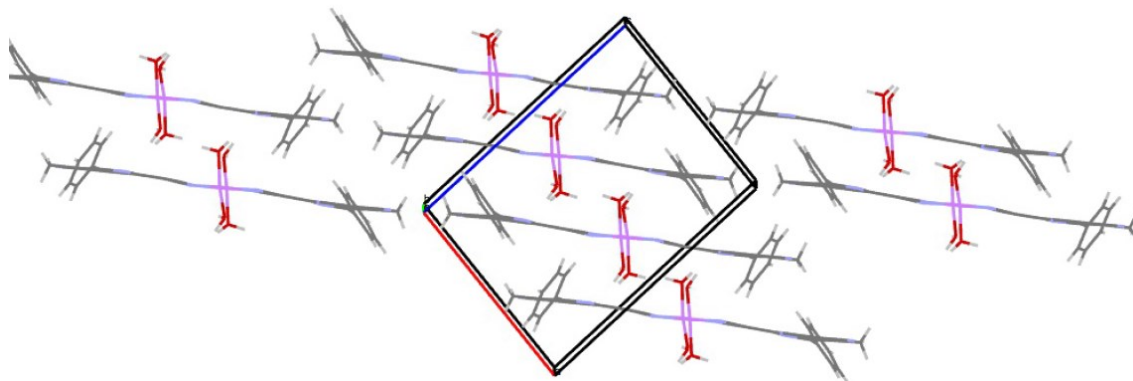

Figure S12 Layers forming a 3D crystal structure of compound **2a**.

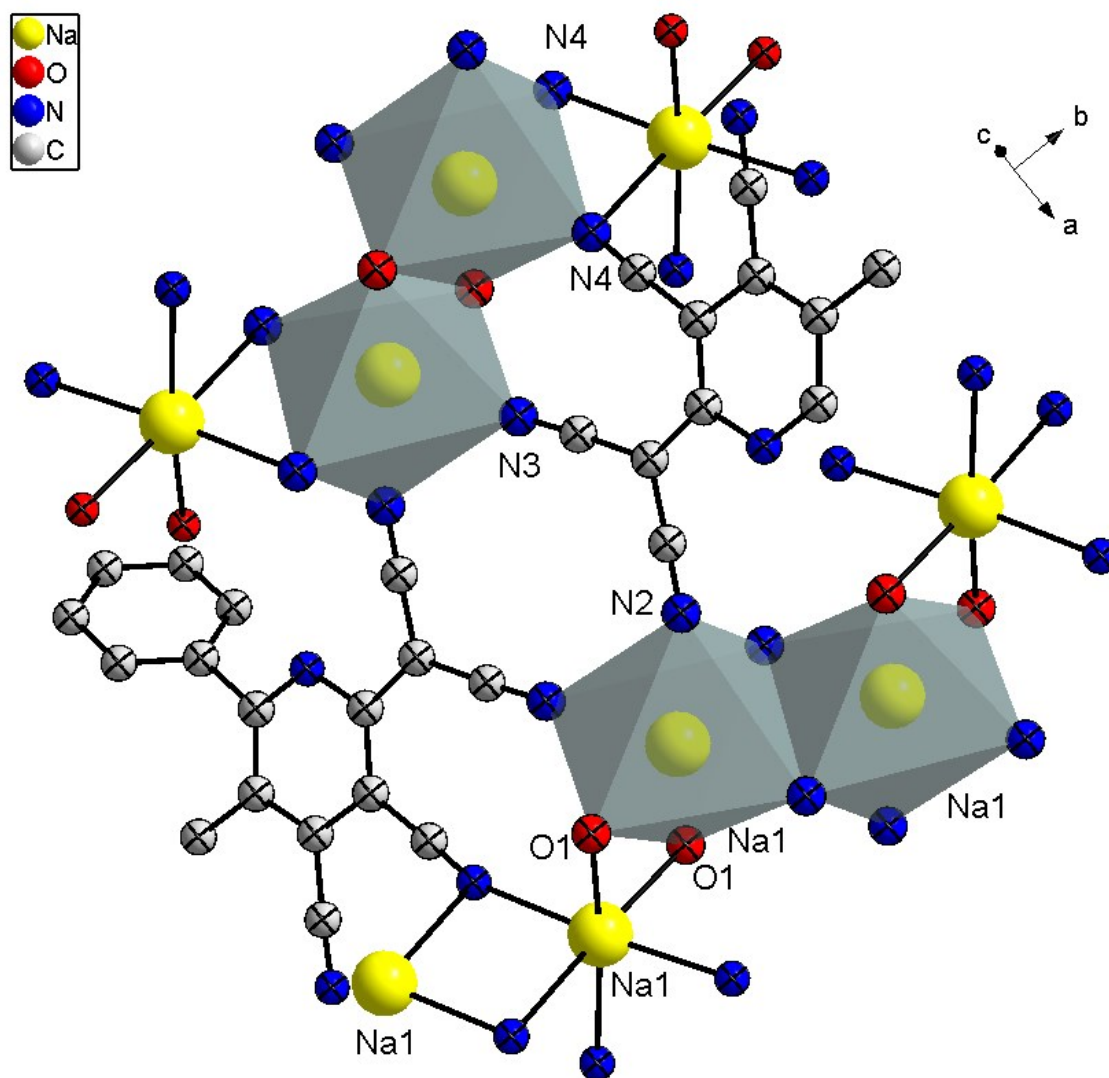

Figure S13 2D layer of crystal **2b**.



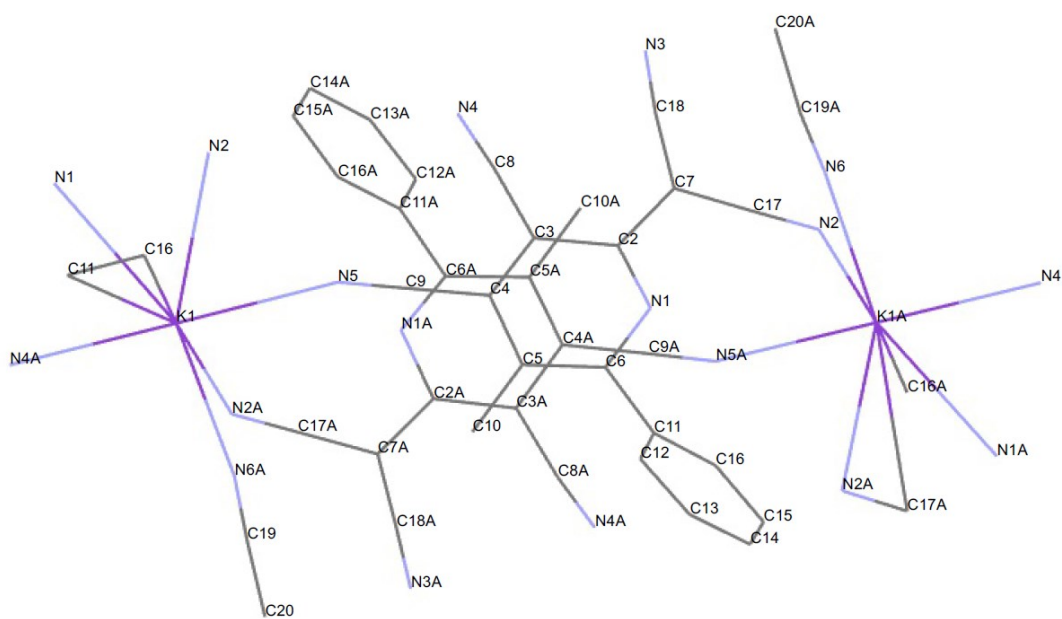

**Figure S14** The building block of the crystal structure **2c**.

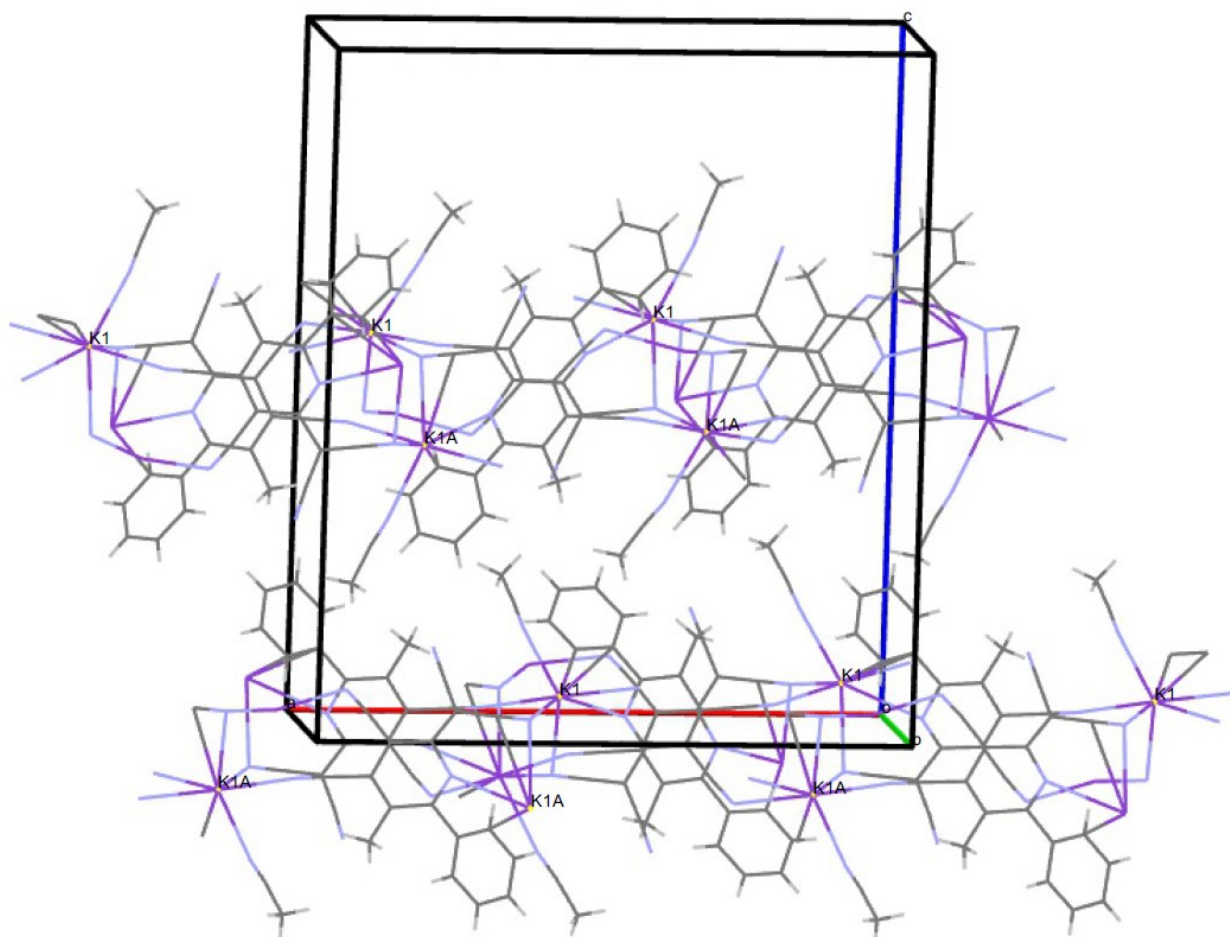

**Figure S15** Two layers of compound **2c** connected with each other by weak van der Waals interactions.

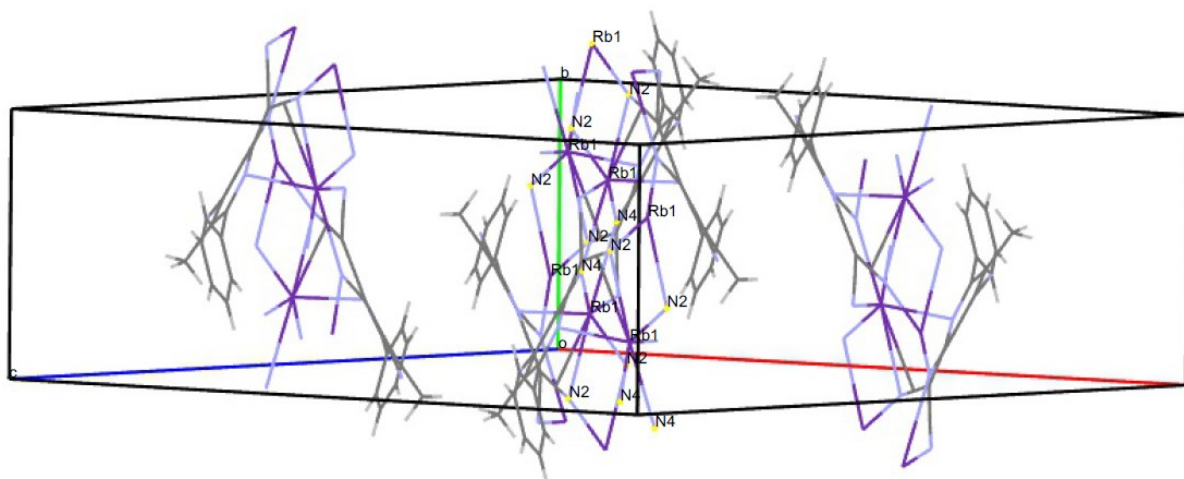

**Figure S16** The layers of compound **2d** connected with each other by weak van der Waals interactions.

**Table S1** Hydrogen bonds for **2a**, **2b** and **2e** [ $\text{\AA}$  and  $^\circ$ ].

| D-H...A                                                                                                                                         | d(D-H)    | d(H...A)  | d(D...A) | $\angle(\text{DHA})$ |
|-------------------------------------------------------------------------------------------------------------------------------------------------|-----------|-----------|----------|----------------------|
| <b>2a</b>                                                                                                                                       |           |           |          |                      |
| O(1)-H(20)...O(2A) <sup>1</sup>                                                                                                                 | 0.860(10) | 2.12(2)   | 2.872(3) | 146(3)               |
| O(1)-H(21)...N(4A) <sup>2</sup>                                                                                                                 | 0.865(10) | 2.112(16) | 2.922(4) | 156(3)               |
| O(1A)-H(20A)...O(2) <sup>3</sup>                                                                                                                | 0.861(10) | 2.086(17) | 2.879(3) | 153(3)               |
| O(1A)-H(21A)...N(4) <sup>4</sup>                                                                                                                | 0.866(10) | 2.102(16) | 2.923(3) | 158(3)               |
| O(2)-H(30)...O(1A) <sup>4</sup>                                                                                                                 | 0.860(10) | 2.165(11) | 3.019(3) | 172(3)               |
| O(2)-H(31)...N(1) <sup>4</sup>                                                                                                                  | 0.861(10) | 2.444(13) | 3.288(3) | 167(3)               |
| O(2A)-H(30A)...O(1) <sup>2</sup>                                                                                                                | 0.859(10) | 2.416(13) | 3.252(4) | 164(3)               |
| O(2A)-H(30A)...N(2A) <sup>2</sup>                                                                                                               | 0.859(10) | 2.59(3)   | 3.108(3) | 120(2)               |
| O(2A)-H(31A)...N(1A) <sup>2</sup>                                                                                                               | 0.856(10) | 2.222(11) | 3.073(3) | 173(3)               |
| Symmetry transformations used to generate equivalent atoms: (1) $x, y-1, z$ ; (2) $-x+1, -y+1, -z+1$ ; (3) $x, y+1, z$ ; (4) $-x+2, -y+1, -z+1$ |           |           |          |                      |
| <b>2b</b>                                                                                                                                       |           |           |          |                      |
| O(1)-H(10)...N(5) <sup>1</sup>                                                                                                                  | 0.89(3)   | 2.10(3)   | 2.949(2) | 160(2)               |
| O(1)-H(11)...N(2) <sup>2</sup>                                                                                                                  | 0.85(3)   | 2.63(3)   | 3.342(2) | 142(3)               |
| Symmetry transformations used to generate equivalent atoms: (1) $x+1/2, y-3/2, z$ ; (2) $x, y-1, z$                                             |           |           |          |                      |
| <b>2e</b>                                                                                                                                       |           |           |          |                      |
| O1-H1...N3                                                                                                                                      | 0.914     | 1.991     | 2.895    | 169.35               |

#### 4. Quantum chemical calculations

**Table S2** Cartesian atomic coordinates (Å) for the TCPy anion (ground state) optimized in non-polar medium

| Atom | Charge | X             | Y             | Z             |
|------|--------|---------------|---------------|---------------|
| N1   | 7.0    | 10.0843805070 | 7.0290508297  | 10.1046487160 |
| C2   | 6.0    | 9.8301693709  | 5.7317538039  | 9.8278693458  |
| C3   | 6.0    | 10.5055810183 | 4.7303545104  | 10.5886369859 |
| C4   | 6.0    | 11.5412992705 | 5.1462051354  | 11.4450644386 |
| C5   | 6.0    | 11.8631981196 | 6.4904892576  | 11.6358266024 |
| C6   | 6.0    | 11.0112246471 | 7.4033275742  | 10.9675123326 |
| C7   | 6.0    | 8.8886908949  | 5.4890608015  | 8.7909972714  |
| C8   | 6.0    | 10.1664519017 | 3.3543369409  | 10.5609197229 |
| C9   | 6.0    | 12.2929093235 | 4.1589158400  | 12.1575355166 |
| C10  | 6.0    | 13.0494365310 | 6.8847079081  | 12.4670348626 |
| C11  | 6.0    | 11.1086098183 | 8.8749809009  | 11.1578332670 |
| C12  | 6.0    | 11.3294320685 | 9.4546462048  | 12.4097895399 |
| C13  | 6.0    | 11.3669337019 | 10.8368216173 | 12.5525427494 |
| C14  | 6.0    | 11.1919568153 | 11.6587536162 | 11.4453018019 |
| C15  | 6.0    | 10.9595591008 | 11.0905986647 | 10.1963025148 |
| C16  | 6.0    | 10.9086283754 | 9.7115112887  | 10.0553718127 |
| C17  | 6.0    | 8.2205298969  | 6.5836271759  | 8.2019803190  |
| C18  | 6.0    | 8.6354308956  | 4.2328768606  | 8.2112413182  |
| N19  | 7.0    | 7.6487952674  | 7.4536877313  | 7.6901065975  |
| N20  | 7.0    | 8.4144459377  | 3.2262119197  | 7.6772671453  |
| N21  | 7.0    | 9.9136511482  | 2.2272848117  | 10.6122290326 |
| N22  | 7.0    | 12.9183584667 | 3.3902026550  | 12.7482027403 |
| H23  | 1.0    | 12.8127318031 | 6.9261627553  | 13.5363968450 |
| H24  | 1.0    | 13.4256512922 | 7.8651296922  | 12.1730146142 |
| H25  | 1.0    | 13.8589275726 | 6.1603735124  | 12.3482971756 |
| H26  | 1.0    | 11.4406703073 | 8.8261732589  | 13.2861266176 |
| H27  | 1.0    | 11.5258898422 | 11.2708687876 | 13.5344957908 |
| H28  | 1.0    | 11.2270484445 | 12.7378070108 | 11.5565077945 |
| H29  | 1.0    | 10.8101860630 | 11.7251724600 | 9.3286841116  |
| H30  | 1.0    | 10.6991757027 | 9.2585074205  | 9.0933508096  |

**Table S3** Cartesian atomic coordinates (Å) for the TCPy anion (ground state) optimized in polar medium.

| Atom | Charge | X             | Y             | Z             |
|------|--------|---------------|---------------|---------------|
| N1   | 7.0    | 10.1049640177 | 7.0316657717  | 10.0762940226 |
| C2   | 6.0    | 9.8579958502  | 5.7310446098  | 9.8104931033  |
| C3   | 6.0    | 10.5984546839 | 4.7359152120  | 10.5046070219 |
| C4   | 6.0    | 11.5342750878 | 5.1585241827  | 11.4701762395 |
| C5   | 6.0    | 11.7579778491 | 6.5028321265  | 11.7545606695 |
| C6   | 6.0    | 10.9786228745 | 7.4099234617  | 10.9948874295 |
| C7   | 6.0    | 8.8473628039  | 5.4819950979  | 8.8315978890  |
| C8   | 6.0    | 10.4924717003 | 3.3475206733  | 10.2420413499 |
| C9   | 6.0    | 12.2904734864 | 4.1651578477  | 12.1684469531 |
| C10  | 6.0    | 12.7964380376 | 6.9211569653  | 12.7514410729 |
| C11  | 6.0    | 11.1078322160 | 8.8811747123  | 11.1563080209 |
| C12  | 6.0    | 11.0627911547 | 9.4907817690  | 12.4122397130 |
| C13  | 6.0    | 11.1341433118 | 10.8742088920 | 12.5248474380 |
| C14  | 6.0    | 11.2687698087 | 11.6621432441 | 11.3870782644 |
| C15  | 6.0    | 11.3151328869 | 11.0618890901 | 10.1320506926 |
| C16  | 6.0    | 11.2236203884 | 9.6818509661  | 10.0167998467 |
| C17  | 6.0    | 8.2493352676  | 6.5717614952  | 8.1709214963  |
| C18  | 6.0    | 8.3272551742  | 4.2234392637  | 8.4929820549  |
| N19  | 7.0    | 7.7266735671  | 7.4339572437  | 7.5957107242  |
| N20  | 7.0    | 7.8431327897  | 3.2140532554  | 8.1827588171  |
| N21  | 7.0    | 10.4692289296 | 2.2068709264  | 10.0552357354 |

|     |     |               |               |               |
|-----|-----|---------------|---------------|---------------|
| N22 | 7.0 | 12.8998987825 | 3.3697425736  | 12.7394206189 |
| H23 | 1.0 | 12.3799494434 | 7.0014026938  | 13.7611623555 |
| H24 | 1.0 | 13.2228282978 | 7.8909013740  | 12.4926678425 |
| H25 | 1.0 | 13.6091186050 | 6.1931685975  | 12.7935808089 |
| H26 | 1.0 | 10.9416278653 | 8.8873620446  | 13.3053983367 |
| H27 | 1.0 | 11.0822295024 | 11.3366802243 | 13.5049766460 |
| H28 | 1.0 | 11.3331836999 | 12.7416410748 | 11.4773154267 |
| H29 | 1.0 | 11.4191515068 | 11.6719474078 | 9.2405991073  |
| H30 | 1.0 | 11.2417935594 | 9.2079048471  | 9.0416386540  |

**Table S4** Characteristics of electronic transitions calculated for ground-state geometry of the TCPy anion in non-polar medium

|                          |     |                                           |           |
|--------------------------|-----|-------------------------------------------|-----------|
| STATE#1 ENERGY           |     | 2.289663 EV                               |           |
| OSCILLATOR STRENGTH      |     | 0.034869                                  |           |
| LAMBDA DIAGNOSTIC        |     | 0.451 (RYDBERG/CHARGE TRANSFER CHARACTER) |           |
| SYMMETRY OF STATE        |     | A                                         |           |
| EXCITATION DE-EXCITATION |     |                                           |           |
| OCC                      | VIR | AMPLITUDE                                 | AMPLITUDE |
| I                        | A   | X(I->A)                                   | Y(A->I)   |
| 72                       | 74  | 0.032375                                  | 0.016995  |
| 73                       | 74  | 0.997566                                  | -0.046391 |
| 68                       | 75  | -0.037482                                 | -0.021552 |
| STATE#2 ENERGY           |     | 3.555310 EV                               |           |
| OSCILLATOR STRENGTH      |     | 0.347315                                  |           |
| LAMBDA DIAGNOSTIC        |     | 0.560 (RYDBERG/CHARGE TRANSFER CHARACTER) |           |
| SYMMETRY OF STATE        |     | A                                         |           |
| EXCITATION DE-EXCITATION |     |                                           |           |
| OCC                      | VIR | AMPLITUDE                                 | AMPLITUDE |
| I                        | A   | X(I->A)                                   | Y(A->I)   |
| 68                       | 74  | -0.037238                                 | -0.011585 |
| 73                       | 75  | -0.996753                                 | 0.055882  |
| 73                       | 77  | -0.018004                                 | -0.032438 |

**Table S5** Characteristics of electronic transitions calculated for ground-state geometry of the TCPy anion in non-polar medium

|                          |     |                                           |           |
|--------------------------|-----|-------------------------------------------|-----------|
| STATE#1 ENERGY           |     | 2.508702 EV                               |           |
| OSCILLATOR STRENGTH      |     | 0.043494                                  |           |
| LAMBDA DIAGNOSTIC        |     | 0.474 (RYDBERG/CHARGE TRANSFER CHARACTER) |           |
| SYMMETRY OF STATE        |     | A                                         |           |
| EXCITATION DE-EXCITATION |     |                                           |           |
| OCC                      | VIR | AMPLITUDE                                 | AMPLITUDE |
| I                        | A   | X(I->A)                                   | Y(A->I)   |
| 69                       | 74  | 0.032674                                  | 0.025224  |
| 73                       | 74  | 0.996931                                  | -0.045542 |
| 68                       | 75  | -0.055694                                 | -0.030286 |
| STATE#2 ENERGY           |     | 3.826053 EV                               |           |
| OSCILLATOR STRENGTH      |     | 0.436573                                  |           |
| LAMBDA DIAGNOSTIC        |     | 0.639 (RYDBERG/CHARGE TRANSFER CHARACTER) |           |
| SYMMETRY OF STATE        |     | A                                         |           |

| EXCITATION DE-EXCITATION |     |           |           |
|--------------------------|-----|-----------|-----------|
| OCC                      | VIR | AMPLITUDE | AMPLITUDE |
| I                        | A   | X(I->A)   | Y(A->I)   |
| 68                       | 74  | -0.035612 | -0.008324 |
| 69                       | 74  | 0.031153  | 0.008299  |
| 73                       | 75  | -0.994640 | 0.064997  |
| 73                       | 78  | 0.051035  | -0.007282 |

**Table S6** Cartesian atomic coordinates (Å) for the TCPy anion (excited state) optimized in non-polar medium

| Atom | Charge | X             | Y             | Z             |
|------|--------|---------------|---------------|---------------|
| N1   | 7.0    | 10.1389884128 | 7.0063692818  | 10.0450262293 |
| C2   | 6.0    | 9.9286065071  | 5.7333766952  | 9.8463285043  |
| C3   | 6.0    | 10.5644566190 | 4.7024070210  | 10.5529750373 |
| C4   | 6.0    | 11.5715105897 | 5.1133387586  | 11.5088382025 |
| C5   | 6.0    | 11.8019696355 | 6.4987188529  | 11.7241653992 |
| C6   | 6.0    | 11.0354580551 | 7.4135881019  | 11.0167068417 |
| C7   | 6.0    | 8.9066352350  | 5.4778307851  | 8.7931119545  |
| C8   | 6.0    | 10.3167789023 | 3.3320948286  | 10.3541917486 |
| C9   | 6.0    | 12.3186945481 | 4.1589304726  | 12.2139207555 |
| C10  | 6.0    | 12.9022878434 | 6.8819297875  | 12.6685596256 |
| C11  | 6.0    | 11.1141327842 | 8.8749390188  | 11.1723192128 |
| C12  | 6.0    | 11.3361573339 | 9.5070219075  | 12.4058358465 |
| C13  | 6.0    | 11.3675338991 | 10.8918731697 | 12.5068731988 |
| C14  | 6.0    | 11.1700990705 | 11.6863993778 | 11.3821871525 |
| C15  | 6.0    | 10.9222538191 | 11.0748745606 | 10.1556487841 |
| C16  | 6.0    | 10.8847220911 | 9.6929725936  | 10.0532601636 |
| C17  | 6.0    | 8.3184116282  | 6.5871698691  | 8.1682530592  |
| C18  | 6.0    | 8.4301788035  | 4.2417988195  | 8.3502911811  |
| N19  | 7.0    | 7.7939921242  | 7.4588190506  | 7.6093839617  |
| N20  | 7.0    | 7.9762879851  | 3.2624068387  | 7.9206970173  |
| N21  | 7.0    | 10.1557727866 | 2.1884522168  | 10.2409306140 |
| N22  | 7.0    | 12.9443237813 | 3.3745302213  | 12.8055918185 |
| H23  | 1.0    | 12.5609909632 | 6.8571888078  | 13.7097969335 |
| H24  | 1.0    | 13.2840953299 | 7.8808336701  | 12.4595180579 |
| H25  | 1.0    | 13.7250730282 | 6.1667796470  | 12.5926593413 |
| H26  | 1.0    | 11.4415875330 | 8.9131855706  | 13.3058649246 |
| H27  | 1.0    | 11.5299472399 | 11.3520657845 | 13.4767917376 |
| H28  | 1.0    | 11.1927021386 | 12.7683559701 | 11.4632098038 |
| H29  | 1.0    | 10.7507316007 | 11.6814043744 | 9.2715121236  |
| H30  | 1.0    | 10.6657236428 | 9.2164605997  | 9.1051087657  |

**Table S7** Cartesian atomic coordinates (Å) for the TCPy anion (excited state) optimized in non-polar medium

| Atom | Charge | X             | Y             | Z             |
|------|--------|---------------|---------------|---------------|
| N1   | 7.0    | 10.1224709406 | 7.0184060470  | 10.0326491221 |
| C2   | 6.0    | 9.9262668059  | 5.7370909769  | 9.8230511933  |
| C3   | 6.0    | 10.5990739701 | 4.7079655608  | 10.5082301975 |
| C4   | 6.0    | 11.5904776120 | 5.1217267246  | 11.4783132689 |
| C5   | 6.0    | 11.7913071090 | 6.5118616362  | 11.7125504340 |
| C6   | 6.0    | 11.0259752013 | 7.4180341117  | 10.9936340666 |
| C7   | 6.0    | 8.8831759837  | 5.4724392315  | 8.8171015831  |
| C8   | 6.0    | 10.3578863006 | 3.3385516844  | 10.3152407261 |
| C9   | 6.0    | 12.3348880310 | 4.1675732616  | 12.1803239220 |
| C10  | 6.0    | 12.8489774688 | 6.9141202624  | 12.6924424465 |
| C11  | 6.0    | 11.1220044117 | 8.8832681947  | 11.1559263228 |
| C12  | 6.0    | 11.1010730127 | 9.4983461608  | 12.4137836962 |
| C13  | 6.0    | 11.1429570022 | 10.8828930304 | 12.5298806256 |
| C14  | 6.0    | 11.2097547341 | 11.6810560777 | 11.3929638351 |

|     |     |               |               |               |
|-----|-----|---------------|---------------|---------------|
| C15 | 6.0 | 11.2272858339 | 11.0821561937 | 10.1354836164 |
| C16 | 6.0 | 11.1750659364 | 9.7005655756  | 10.0188786678 |
| C17 | 6.0 | 8.2442605424  | 6.5733751346  | 8.2218373181  |
| C18 | 6.0 | 8.4094457557  | 4.2251733815  | 8.3943649292  |
| N19 | 7.0 | 7.6787816025  | 7.4369892678  | 7.6948066961  |
| N20 | 7.0 | 7.9626032081  | 3.2309759910  | 7.9968070511  |
| N21 | 7.0 | 10.2059944397 | 2.1915199651  | 10.2090153314 |
| N22 | 7.0 | 12.9504297711 | 3.3651564458  | 12.7600779553 |
| H23 | 1.0 | 12.5011430873 | 6.7831136236  | 13.7236742583 |
| H24 | 1.0 | 13.1461762902 | 7.9539265436  | 12.5653414865 |
| H25 | 1.0 | 13.7322890939 | 6.2798262804  | 12.5748699518 |
| H26 | 1.0 | 11.0166236019 | 8.8902988134  | 13.3083784845 |
| H27 | 1.0 | 11.1118739609 | 11.3394456093 | 13.5141688562 |
| H28 | 1.0 | 11.2414238539 | 12.7618452228 | 11.4846186923 |
| H29 | 1.0 | 11.2782930143 | 11.6964639250 | 9.2418579976  |
| H30 | 1.0 | 11.1702640774 | 9.2329330186  | 9.0401416565  |

**Table S8** Characteristics of electronic transitions calculated for excited-state geometry of the TCPy anion in non-polar medium

|                          |     |                                           |           |
|--------------------------|-----|-------------------------------------------|-----------|
| STATE#1 ENERGY           |     | 1.629363 EV                               |           |
| OSCILLATOR STRENGTH      |     | 0.014458                                  |           |
| LAMBDA DIAGNOSTIC        |     | 0.376 (RYDBERG/CHARGE TRANSFER CHARACTER) |           |
| SYMMETRY OF STATE        |     | A                                         |           |
| EXCITATION DE-EXCITATION |     |                                           |           |
| OCC                      | VIR | AMPLITUDE                                 | AMPLITUDE |
| I                        | A   | X(I->A)                                   | Y(A->I)   |
| 73                       | 74  | 0.999325                                  | -0.044406 |
| STATE#2 ENERGY           |     | 3.238859 EV                               |           |
| OSCILLATOR STRENGTH      |     | 0.246897                                  |           |
| LAMBDA DIAGNOSTIC        |     | 0.457 (RYDBERG/CHARGE TRANSFER CHARACTER) |           |
| SYMMETRY OF STATE        |     | A                                         |           |
| EXCITATION DE-EXCITATION |     |                                           |           |
| OCC                      | VIR | AMPLITUDE                                 | AMPLITUDE |
| I                        | A   | X(I->A)                                   | Y(A->I)   |
| 68                       | 74  | -0.035612                                 | -0.008324 |
| 69                       | 74  | 0.031153                                  | 0.008299  |
| 73                       | 75  | -0.994640                                 | 0.064997  |
| 73                       | 78  | 0.051035                                  | -0.007282 |
| STATE#3 ENERGY           |     | 3.656220 EV                               |           |
| OSCILLATOR STRENGTH      |     | 0.172083                                  |           |
| LAMBDA DIAGNOSTIC        |     | 0.534 (RYDBERG/CHARGE TRANSFER CHARACTER) |           |
| SYMMETRY OF STATE        |     | A                                         |           |
| EXCITATION DE-EXCITATION |     |                                           |           |
| OCC                      | VIR | AMPLITUDE                                 | AMPLITUDE |
| I                        | A   | X(I->A)                                   | Y(A->I)   |
| 67                       | 74  | 0.135631                                  | -0.006816 |
| 69                       | 74  | -0.067596                                 | -0.007302 |
| 70                       | 74  | -0.521031                                 | 0.011458  |
| 71                       | 74  | 0.441601                                  | -0.007000 |
| 72                       | 74  | 0.704795                                  | -0.030861 |
| 69                       | 75  | 0.036044                                  | 0.011235  |
| 73                       | 77  | -0.040381                                 | -0.000062 |
| 70                       | 91  | 0.035883                                  | -0.006472 |

**Table S9** Characteristics of electronic transitions calculated for excited-state geometry of the TCPy anion in polar medium

|                          |       |                                           |                   |
|--------------------------|-------|-------------------------------------------|-------------------|
| STATE#1 ENERGY           |       | 2.005308 EV                               |                   |
| OSCILLATOR STRENGTH      |       | 0.024976                                  |                   |
| LAMBDA DIAGNOSTIC        |       | 0.421 (RYDBERG/CHARGE TRANSFER CHARACTER) |                   |
| SYMMETRY OF STATE        |       | A                                         |                   |
| EXCITATION DE-EXCITATION |       |                                           |                   |
| OCC I                    | VIR A | AMPLITUDE X(I->A)                         | AMPLITUDE Y(A->I) |
| 73                       | 74    | -0.998258                                 | 0.043575          |
| 69                       | 75    | -0.039100                                 | -0.024591         |
| STATE#2 ENERGY           |       | 3.654885 EV                               |                   |
| OSCILLATOR STRENGTH      |       | 0.301212                                  |                   |
| LAMBDA DIAGNOSTIC        |       | 0.524 (RYDBERG/CHARGE TRANSFER CHARACTER) |                   |
| SYMMETRY OF STATE        |       | A                                         |                   |
| EXCITATION DE-EXCITATION |       |                                           |                   |
| OCC I                    | VIR A | AMPLITUDE X(I->A)                         | AMPLITUDE Y(A->I) |
| 68                       | 74    | -0.051731                                 | 0.005408          |
| 69                       | 74    | 0.047404                                  | 0.021496          |
| 70                       | 74    | -0.202984                                 | 0.003300          |
| 71                       | 74    | 0.103407                                  | 0.000088          |
| 72                       | 74    | 0.957100                                  | -0.031074         |
| 68                       | 75    | 0.036762                                  | 0.015441          |
| 69                       | 75    | -0.035382                                 | -0.008211         |
| 73                       | 75    | -0.119511                                 | 0.009279          |
| 73                       | 78    | 0.040413                                  | -0.002064         |
| STATE#3 ENERGY           |       | 3.675697 EV                               |                   |
| OSCILLATOR STRENGTH      |       | 0.306740                                  |                   |
| LAMBDA DIAGNOSTIC        |       | 0.558 (RYDBERG/CHARGE TRANSFER CHARACTER) |                   |
| SYMMETRY OF STATE        |       | A                                         |                   |
| EXCITATION DE-EXCITATION |       |                                           |                   |
| OCC I                    | VIR A | AMPLITUDE X(I->A)                         | AMPLITUDE Y(A->I) |
| 69                       | 74    | -0.042086                                 | -0.007329         |
| 72                       | 74    | 0.122414                                  | -0.001192         |
| 72                       | 75    | 0.036561                                  | 0.007627          |
| 73                       | 75    | 0.981187                                  | -0.046684         |
| 73                       | 78    | -0.105998                                 | 0.013807          |

**Table S10** Cartesian atomic coordinates (Å) for Li-1 model (two Li<sup>+</sup> cations positioned at the dicyanomethylene group of the TCPy anion (excited state))

| Atom | Charge | X             | Y             | Z             |
|------|--------|---------------|---------------|---------------|
| N1   | 7.0    | 10.1224641337 | 7.0184091821  | 10.0326557809 |
| C2   | 6.0    | 9.9262678721  | 5.7370850686  | 9.8230620138  |
| C3   | 6.0    | 10.5990871264 | 4.7079732467  | 10.5082409608 |
| C4   | 6.0    | 11.5904814440 | 5.1217280119  | 11.4783360913 |
| C5   | 6.0    | 11.7912974237 | 6.5118683428  | 11.7125649425 |
| C6   | 6.0    | 11.0259652096 | 7.4180335284  | 10.9936390682 |
| C7   | 6.0    | 8.8831849772  | 5.4724282761  | 8.8171197404  |
| C8   | 6.0    | 10.3578956719 | 3.3385586883  | 10.3152349155 |
| C9   | 6.0    | 12.3348992892 | 4.1675748598  | 12.1803334278 |
| C10  | 6.0    | 12.8489510763 | 6.9141298665  | 12.6924732286 |
| C11  | 6.0    | 11.1219937819 | 8.8832743038  | 11.1559294258 |
| C12  | 6.0    | 11.1010743012 | 9.4983522039  | 12.4137859574 |
| C13  | 6.0    | 11.1429812020 | 10.8828990345 | 12.5298774661 |
| C14  | 6.0    | 11.2097871476 | 11.6810577110 | 11.3929571340 |
| C15  | 6.0    | 11.2272829468 | 11.0821574978 | 10.1354783117 |
| C16  | 6.0    | 11.1750671382 | 9.7005648097  | 10.0188796122 |

|      |     |               |               |               |
|------|-----|---------------|---------------|---------------|
| C17  | 6.0 | 8.2442605457  | 6.5733590994  | 8.2218499365  |
| C18  | 6.0 | 8.4094538517  | 4.2251646545  | 8.3943708867  |
| N19  | 7.0 | 7.6787516973  | 7.4369258793  | 7.6947743491  |
| N20  | 7.0 | 7.9625454738  | 3.2310225743  | 7.9967486620  |
| N21  | 7.0 | 10.2060091797 | 2.1915278888  | 10.2089963136 |
| N22  | 7.0 | 12.9504552345 | 3.3651522936  | 12.7600667242 |
| H23  | 1.0 | 12.5011272328 | 6.7830882103  | 13.7237032809 |
| H24  | 1.0 | 13.1461811585 | 7.9539272493  | 12.5653778382 |
| H25  | 1.0 | 13.7322640898 | 6.2798353916  | 12.5748909481 |
| H26  | 1.0 | 11.0166559419 | 8.8903107799  | 13.3083871451 |
| H27  | 1.0 | 11.1118943687 | 11.3394599728 | 13.5141615768 |
| H28  | 1.0 | 11.2414634016 | 12.7618460026 | 11.4846212865 |
| H29  | 1.0 | 11.2783207465 | 11.6964555788 | 9.2418479515  |
| H30  | 1.0 | 11.1702753358 | 9.2329244475  | 9.0401463715  |
| LI31 | 3.0 | 6.716         | 9.009         | 6.797         |
| LI32 | 3.0 | 7.226         | 1.436         | 7.340         |

**Table S11** Cartesian atomic coordinates (Å) for Li-2 model (two Li<sup>+</sup> cations positioned at the cyano groups attached to the pyridine fragment of the TCPy anion (excited state)).

| Atom | Charge | X             | Y             | Z             |
|------|--------|---------------|---------------|---------------|
| N1   | 7.0    | 10.1224641337 | 7.0184091821  | 10.0326557809 |
| C2   | 6.0    | 9.9262678721  | 5.7370850686  | 9.8230620138  |
| C3   | 6.0    | 10.5990871264 | 4.7079732467  | 10.5082409608 |
| C4   | 6.0    | 11.5904814440 | 5.1217280119  | 11.4783360913 |
| C5   | 6.0    | 11.7912974237 | 6.5118683428  | 11.7125649425 |
| C6   | 6.0    | 11.0259652096 | 7.4180335284  | 10.9936390682 |
| C7   | 6.0    | 8.8831849772  | 5.4724282761  | 8.8171197404  |
| C8   | 6.0    | 10.3578956719 | 3.3385586883  | 10.3152349155 |
| C9   | 6.0    | 12.3348992892 | 4.1675748598  | 12.1803334278 |
| C10  | 6.0    | 12.8489510763 | 6.9141298665  | 12.6924732286 |
| C11  | 6.0    | 11.1219937819 | 8.8832743038  | 11.1559294258 |
| C12  | 6.0    | 11.1010743012 | 9.4983522039  | 12.4137859574 |
| C13  | 6.0    | 11.1429812020 | 10.8828990345 | 12.5298774661 |
| C14  | 6.0    | 11.2097871476 | 11.6810577110 | 11.3929571340 |
| C15  | 6.0    | 11.2272829468 | 11.0821574978 | 10.1354783117 |
| C16  | 6.0    | 11.1750671382 | 9.7005648097  | 10.0188796122 |
| C17  | 6.0    | 8.2442605457  | 6.5733590994  | 8.2218499365  |
| C18  | 6.0    | 8.4094538517  | 4.2251646545  | 8.3943708867  |
| N19  | 7.0    | 7.6787516973  | 7.4369258793  | 7.6947743491  |
| N20  | 7.0    | 7.9625454738  | 3.2310225743  | 7.9967486620  |
| N21  | 7.0    | 10.2060091797 | 2.1915278888  | 10.2089963136 |
| N22  | 7.0    | 12.9504552345 | 3.3651522936  | 12.7600667242 |
| H23  | 1.0    | 12.5011272328 | 6.7830882103  | 13.7237032809 |
| H24  | 1.0    | 13.1461811585 | 7.9539272493  | 12.5653778382 |
| H25  | 1.0    | 13.7322640898 | 6.2798353916  | 12.5748909481 |
| H26  | 1.0    | 11.0166559419 | 8.8903107799  | 13.3083871451 |
| H27  | 1.0    | 11.1118943687 | 11.3394599728 | 13.5141615768 |
| H28  | 1.0    | 11.2414634016 | 12.7618460026 | 11.4846212865 |
| H29  | 1.0    | 11.2783207465 | 11.6964555788 | 9.2418479515  |
| H30  | 1.0    | 11.1702753358 | 9.2329244475  | 9.0401463715  |
| LI31 | 3.0    | 9.892         | 0.180         | 9.970         |
| LI32 | 3.0    | 14.037        | 1.961         | 13.785        |

**Table S12** Characteristics of electronic transitions calculated for Li-1 model

|                     |                                           |
|---------------------|-------------------------------------------|
| STATE#1 ENERGY      | 2.438720 EV                               |
| OSCILLATOR STRENGTH | 0.041561                                  |
| LAMBDA DIAGNOSTIC   | 0.462 (RYDBERG/CHARGE TRANSFER CHARACTER) |
| SYMMETRY OF STATE   | A                                         |



| EXCITATION DE-EXCITATION |          |                                           |                      |
|--------------------------|----------|-------------------------------------------|----------------------|
| OCC<br>I                 | VIR<br>A | AMPLITUDE<br>X(I->A)                      | AMPLITUDE<br>Y(A->I) |
| 74                       | 76       | 0.040909                                  | 0.013522             |
| 75                       | 76       | -0.996309                                 | 0.040061             |
| 71                       | 77       | -0.057296                                 | -0.030369            |
| 74                       | 77       | -0.031650                                 | -0.010844            |
| STATE#2 ENERGY           |          | 3.618889 EV                               |                      |
| OSCILLATOR STRENGTH      |          | 0.266821                                  |                      |
| LAMBDA DIAGNOSTIC        |          | 0.495 (RYDBERG/CHARGE TRANSFER CHARACTER) |                      |
| SYMMETRY OF STATE        |          | A                                         |                      |
| EXCITATION DE-EXCITATION |          |                                           |                      |
| OCC<br>I                 | VIR<br>A | AMPLITUDE<br>X(I->A)                      | AMPLITUDE<br>Y(A->I) |
| 70                       | 76       | 0.031948                                  | -0.009023            |
| 71                       | 76       | 0.055583                                  | 0.018231             |
| 72                       | 76       | 0.120876                                  | -0.002421            |
| 73                       | 76       | 0.068571                                  | 0.000478             |
| 74                       | 76       | -0.982182                                 | 0.028191             |
| 75                       | 76       | -0.037739                                 | 0.015394             |
| 71                       | 77       | -0.035383                                 | -0.010274            |
| 75                       | 77       | -0.035636                                 | 0.002903             |

**Table S13** Characteristics of electronic transitions calculated for Li-2 model

| STATE#1 ENERGY           |          | 1.726119 EV                               |                      |
|--------------------------|----------|-------------------------------------------|----------------------|
| OSCILLATOR STRENGTH      |          | 0.020936                                  |                      |
| LAMBDA DIAGNOSTIC        |          | 0.431 (RYDBERG/CHARGE TRANSFER CHARACTER) |                      |
| SYMMETRY OF STATE        |          | A                                         |                      |
| EXCITATION DE-EXCITATION |          |                                           |                      |
| OCC<br>I                 | VIR<br>A | AMPLITUDE<br>X(I->A)                      | AMPLITUDE<br>Y(A->I) |
| 71                       | 76       | 0.032281                                  | 0.028886             |
| 75                       | 76       | 0.999271                                  | -0.052430            |
| 70                       | 77       | -0.035534                                 | -0.026520            |
| STATE#2 ENERGY           |          | 3.326174 EV                               |                      |
| OSCILLATOR STRENGTH      |          | 0.253117                                  |                      |
| LAMBDA DIAGNOSTIC        |          | 0.481 (RYDBERG/CHARGE TRANSFER CHARACTER) |                      |
| SYMMETRY OF STATE        |          | A                                         |                      |
| EXCITATION DE-EXCITATION |          |                                           |                      |
| OCC<br>I                 | VIR<br>A | AMPLITUDE<br>X(I->A)                      | AMPLITUDE<br>Y(A->I) |
| 70                       | 76       | -0.041349                                 | -0.012429            |
| 72                       | 76       | -0.135637                                 | 0.001932             |
| 73                       | 76       | -0.076924                                 | -0.000814            |
| 74                       | 76       | -0.982040                                 | 0.031228             |
| 70                       | 77       | -0.039223                                 | -0.015977            |

## 5. Experimental

### Materials and apparatus

The progress of reactions and the purity of products were monitored by TLC on Sorbfil plates (spots were visualized under UV light, by treatment with iodine vapor or by heating). The IR spectra were recorded on an FSM-1202 spectrometer with Fourier transform from samples dispersed in mineral oil. The NMR spectra were measured in DMSO-*d*<sub>6</sub> on a Bruker DRX500 and Bruker AV600 spectrometer using TMS as an internal reference. Elemental analyses were performed using a FlashEA 1112 CHN analyzer. The mass spectra (EI, 70 eV) were obtained on a Finnigan MAT INCOS-50 spectrometer. Melting points were determined on a device OptiMelt MPA-100. Solid-state emission spectra were registered in powders at room temperature on a Cary Eclipse fluorescence spectrophotometer. The fluorescence quantum yield (QY) was determined by the reported procedure and calculated according to the  $QY = f/(\gamma R_0 - R)$  where, *f* is the integrated fluorescence of the sample,  $\gamma$  is the calibration factor, *R*<sub>0</sub> is the back-scattered intensity of excitation light from a blank (KBr) and *R* the back-scattered intensity of a loaded sample. The excitation wavelength ( $\lambda_{ex}$  475 nm) was selected from the excitation spectra of the compounds **4**. Calibration factor ( $\gamma$ ) was found using diffusion reflection in a non-absorbed wavelength (775 nm) from the relative intensities of reflections of the sample and KBr powder. The XRD data of **4a-d** were collected by using STOE diffractometer Pilatus100 K detector, focusing mirror collimation Cu K $\alpha$  (1.54086 Å) radiation, rotation method mode. STOE X-AREA software was used for cells refinement and data reduction. Data collection and image processing was performed with X-Area 1.67 (STOE & Cie GmbH, Darmstadt, Germany, 2013). Intensity data were scaled with LANA (part of X-Area) in order to minimize differences of intensities of symmetry-equivalent reflections (multi-scan method). The structures were solved with SHELXS and refined with SHELXL program.<sup>15</sup> The non-hydrogen atoms were refined by using the anisotropic full matrix least-square procedure. Hydrogen atoms were placed in the calculated positions and allowed to ride on their parent atoms. Molecular geometry calculations were performed with the SHELX program.

### Synthetic procedures

2-(Dicyanomethylene)-5-methyl-6-phenyl-1,2-dihydropyridine-3,4-dicarbo-nitrile (**TCPy**) 1 g (3.53 mmol) was dissolved in 20 ml of organic solvent, then 3.59 mmol of the corresponding metal acetate was added. The reaction mixture was stirred at 50 °C for 3 min. Further precipitate crystals were filtered off, washed with organic solvent (20 ml) twice. The resulting product was dried in a vacuum desiccator.

### Characterization

Lithium 3,4-dicyano-2-(dicyanomethylene)-5-methyl-6-phenyl-2H-pyridin-1-ide (**2a**). Yellow solid. Yield: 95%. mp 178-179 °C (dec.). IR (KBr): 2200, 2183 (CN), 1664, 1534 cm<sup>-1</sup>. <sup>1</sup>H NMR (500.13 MHz, DMSO-*d*<sub>6</sub>):  $\delta$ = 2.26 (s, 3H, CH<sub>3</sub>), 7.46–7.54 (m, 5H, Ar). <sup>13</sup>C NMR (125.76 MHz, DMSO-*d*<sub>6</sub>):  $\delta$ =18.04 (CH<sub>3</sub>), 41.05 (C(CN)<sub>2</sub>), 92.41 ( $\beta$ -Pyr), 115.39 (CN), 115.74 (CN), 121.70 (2CN), 122.25, 126.22, 128.50, 129.13, 129.44, 139.03, 159.03, 161.90, 176.52. Anal. calcd for C<sub>17</sub>H<sub>8</sub>LiN<sub>5</sub>\*2H<sub>2</sub>O: C, 62.78; H, 3.72; N, 21.53. Found: C, 62.70; H, 3.78; N, 21.46.

Sodium 3,4-dicyano-2-(dicyanomethylene)-5-methyl-6-phenyl-2H-pyridin-1-ide (**2b**). Orange solid. Yield: 96%. mp 261-262 °C (dec.). IR (KBr): 2200, 2183 (CN), 1664, 1534 cm<sup>-1</sup>. <sup>1</sup>H NMR (500.13 MHz, DMSO-*d*<sub>6</sub>):  $\delta$ =2.26 (s, 3H, CH<sub>3</sub>), 7.46–7.54 (m, 5H, Ar). <sup>13</sup>C NMR (125.76 MHz, DMSO-*d*<sub>6</sub>):  $\delta$ =18.05 (CH<sub>3</sub>), 92.41 ( $\beta$ -Pyr), 115.39 (CN), 115.74 (CN), 121.69 (2CN), 122.22,

128.50, 129.13, 129.43, 139.05, 159.05, 161.90. Anal. calcd for  $C_{17}H_8NaN_5 \cdot H_2O$ : C, 63.16; H, 3.12; N, 21.66. Found: C, 63.03; H, 3.18; N, 21.59.

Potassium 3,4-dicyano-2-(dicyanomethylene)-5-methyl-6-phenyl-2H-pyridin-1-ide (**2c**). Orange solid. Yield: 95%. mp 265–266 °C (dec.). IR (KBr): 2200, 2183 (CN), 1664, 1534  $cm^{-1}$ .  $^1H$  NMR (500.13 MHz, DMSO- $d_6$ ):  $\delta$  = 2.26 (s, 3H,  $CH_3$ ), 7.46–7.54 (m, 5H, Ar).  $^{13}C$  NMR (125.76 MHz, DMSO- $d_6$ ):  $\delta$  = 18.05 ( $CH_3$ ), 41.08 ( $C(CN)_2$ ), 92.41 ( $\beta$ -Pyr), 115.38 (CN), 115.76 (CN), 121.70 (2CN), 122.23, 126.22, 128.50, 128.65, 128.96, 129.13, 129.43, 139.03, 159.05, 161.90. Anal. calcd for  $C_{17}H_8KN_5$ : C, 63.53; H, 2.51; N, 21.79. Found: C, 63.40; H, 2.56; N, 21.71

Rubidium 3,4-dicyano-2-(dicyanomethylene)-5-methyl-6-phenyl-2H-pyridin-1-ide (**2d**). Orange solid. Yield: 93%. mp 212–213 °C (dec.). IR (KBr): 2200, 2183 (CN), 1664, 1534  $cm^{-1}$ .  $^1H$  NMR (500.13 MHz, DMSO- $d_6$ ):  $\delta$  = 2.26 (s, 3H,  $CH_3$ ), 7.46–7.54 (m, 5H, Ar).  $^{13}C$  NMR (125.76 MHz, DMSO- $d_6$ ):  $\delta$  = 18.05 ( $CH_3$ ), 41.09 ( $C(CN)_2$ ), 92.41 ( $\beta$ -Pyr), 115.39 (CN), 115.77 (CN), 121.70, (2CN), 122.22, 126.22, 128.50, 129.13, 129.44, 139.04, 159.05, 161.90. Anal. calcd for  $C_{17}H_8N_5Rb$ : C, 55.52; H, 2.19; N, 19.04. Found: C, 55.38; H, 2.23; N, 18.97.

Cesium 3,4-dicyano-2-(dicyanomethylene)-5-methyl-6-phenyl-2H-pyridin-1-ide (**2e**). Orange solid. Yield: 93%. mp 303–304 °C (dec.). IR (KBr): 2200, 2183 (CN), 1664, 1534  $cm^{-1}$ .  $^1H$  NMR (500.13 MHz, DMSO- $d_6$ ):  $\delta$  = 2.25 (s, 3H,  $CH_3$ ), 7.46–7.54 (m, 5H, Ar).  $^{13}C$  NMR (125.76 MHz, DMSO- $d_6$ ):  $\delta$  = 17.72 ( $CH_3$ ), 40.75 ( $C(CN)_2$ ), 92.07 ( $\beta$ -Pyr), 115.07 (CN), 115.43 (CN), 121.36 (2CN), 121.89, 125.89, 128.17, 128.81, 129.11, 138.71, 158.71, 161.56. Anal. calcd for  $C_{17}H_8CsN_5 \cdot CH_3OH$ : C, 48.34; H, 2.70; N, 15.66. Found: C, 48.21; H, 2.73; N, 15.60.

## 5. NMR spectra

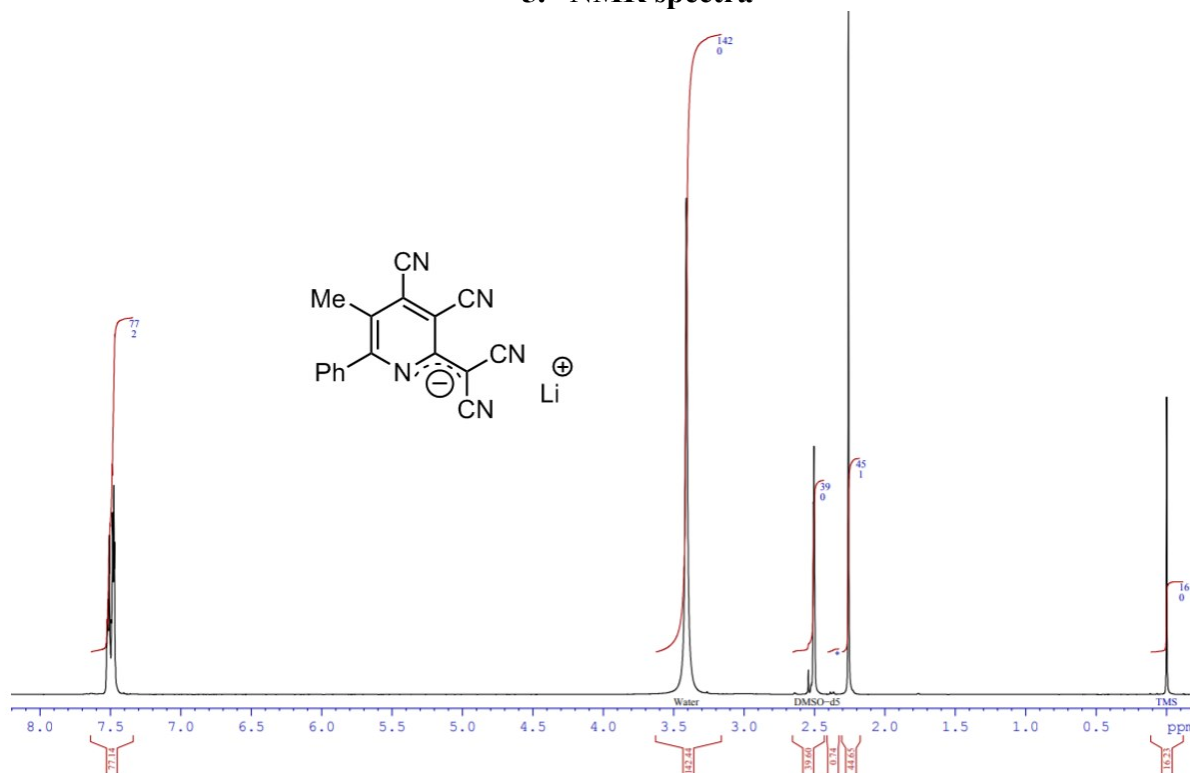

**Figure S17**  $^1\text{H}$  NMR-spectrum of **2a** (500.13 MHz,  $\text{DMSO-d}_6$ ).

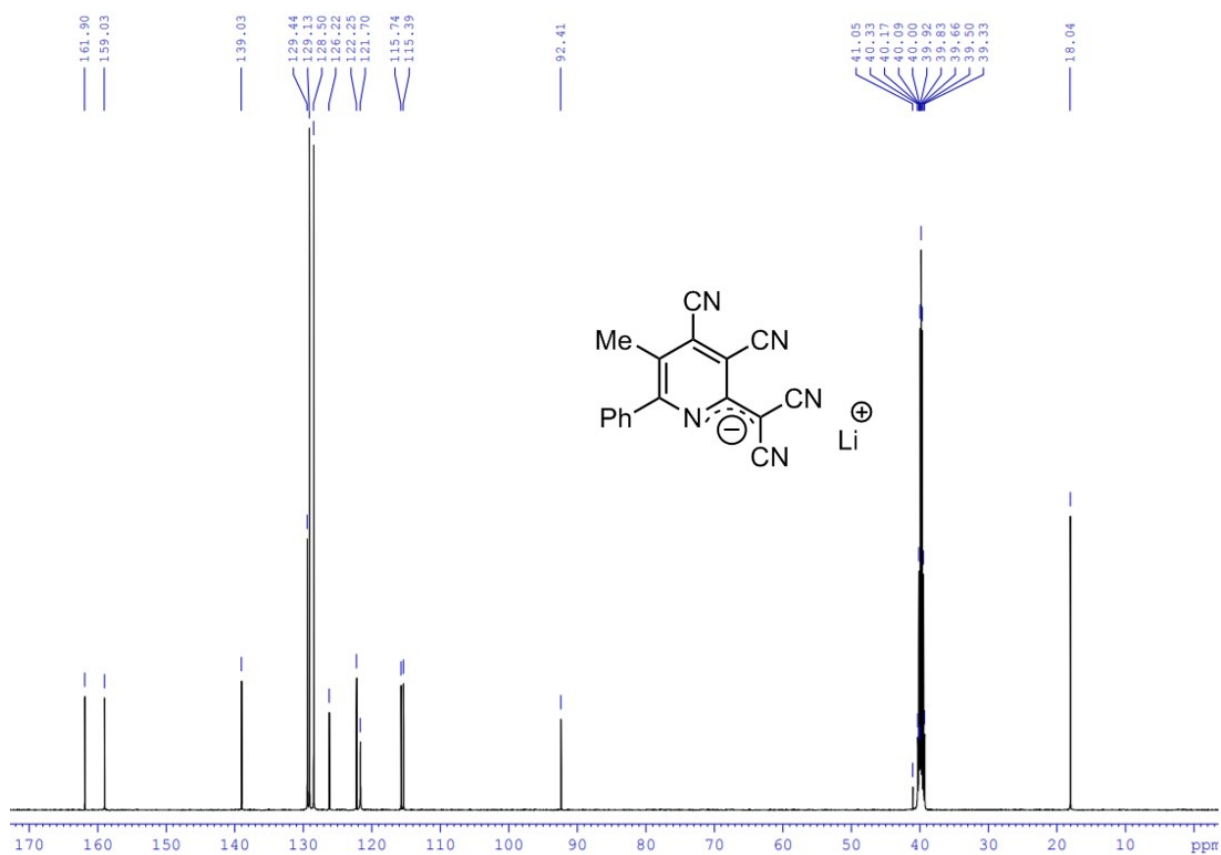

**Figure S18**  $^{13}\text{C}$  NMR-spectrum of **2a** (500.13 MHz,  $\text{DMSO-d}_6$ ).

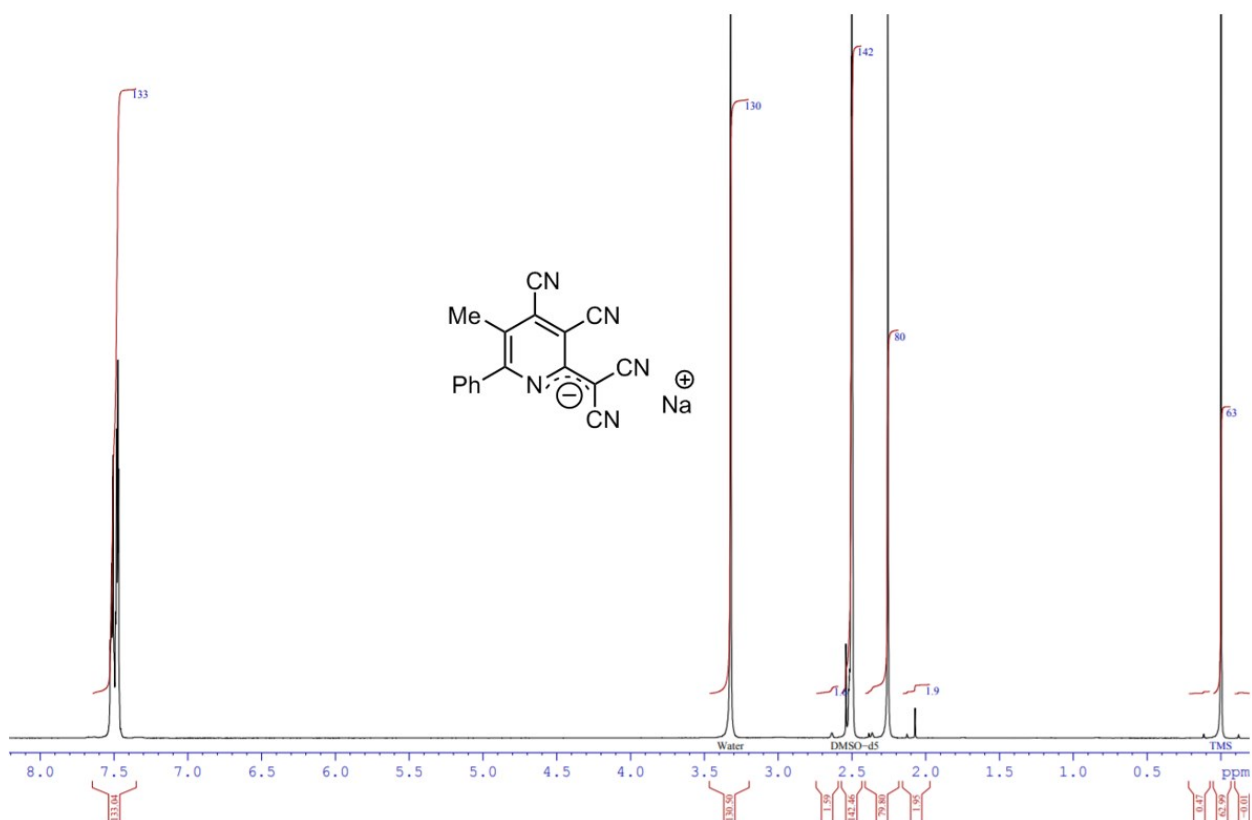

**Figure S19**  $^1\text{H}$  NMR-spectrum of **2b** (500.13 MHz,  $\text{DMSO-d}_6$ ).

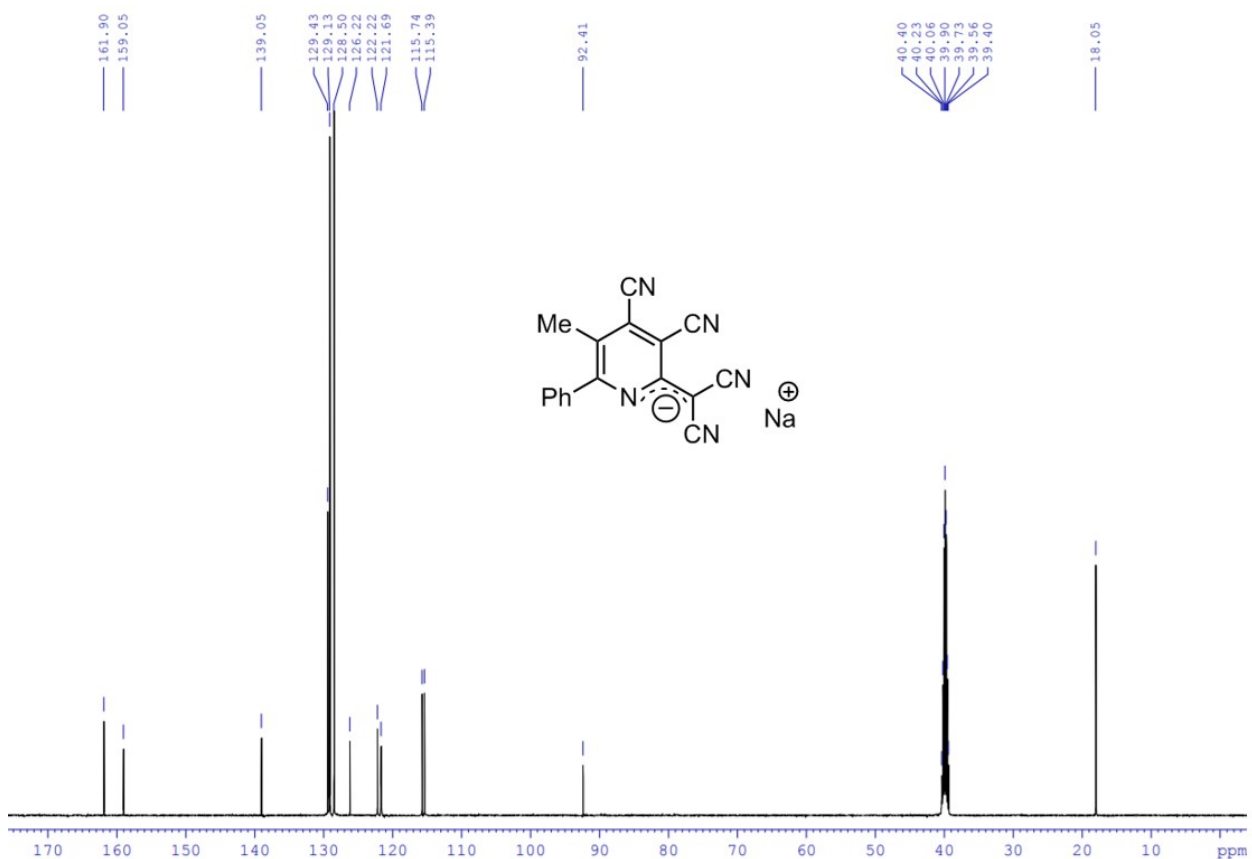

**Figure S20**  $^{13}\text{C}$  NMR-spectrum of **2b** (500.13 MHz,  $\text{DMSO-d}_6$ ).

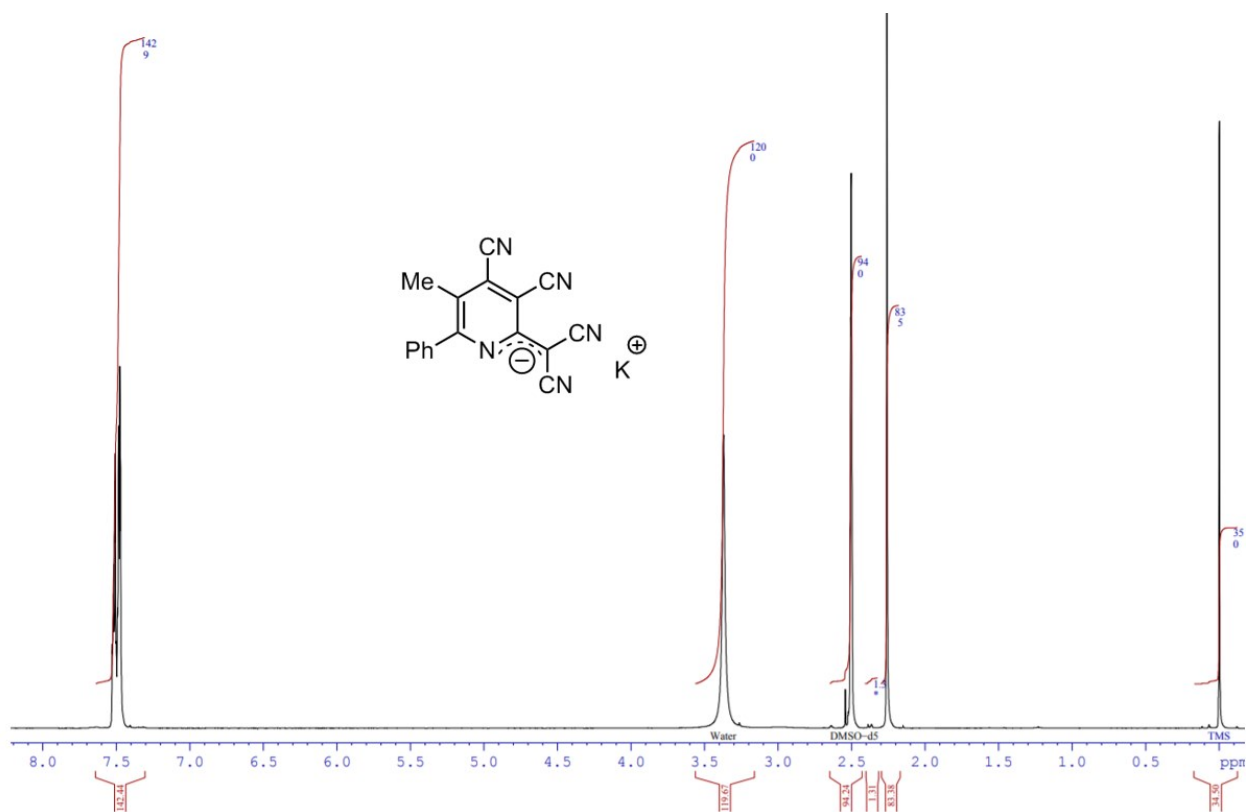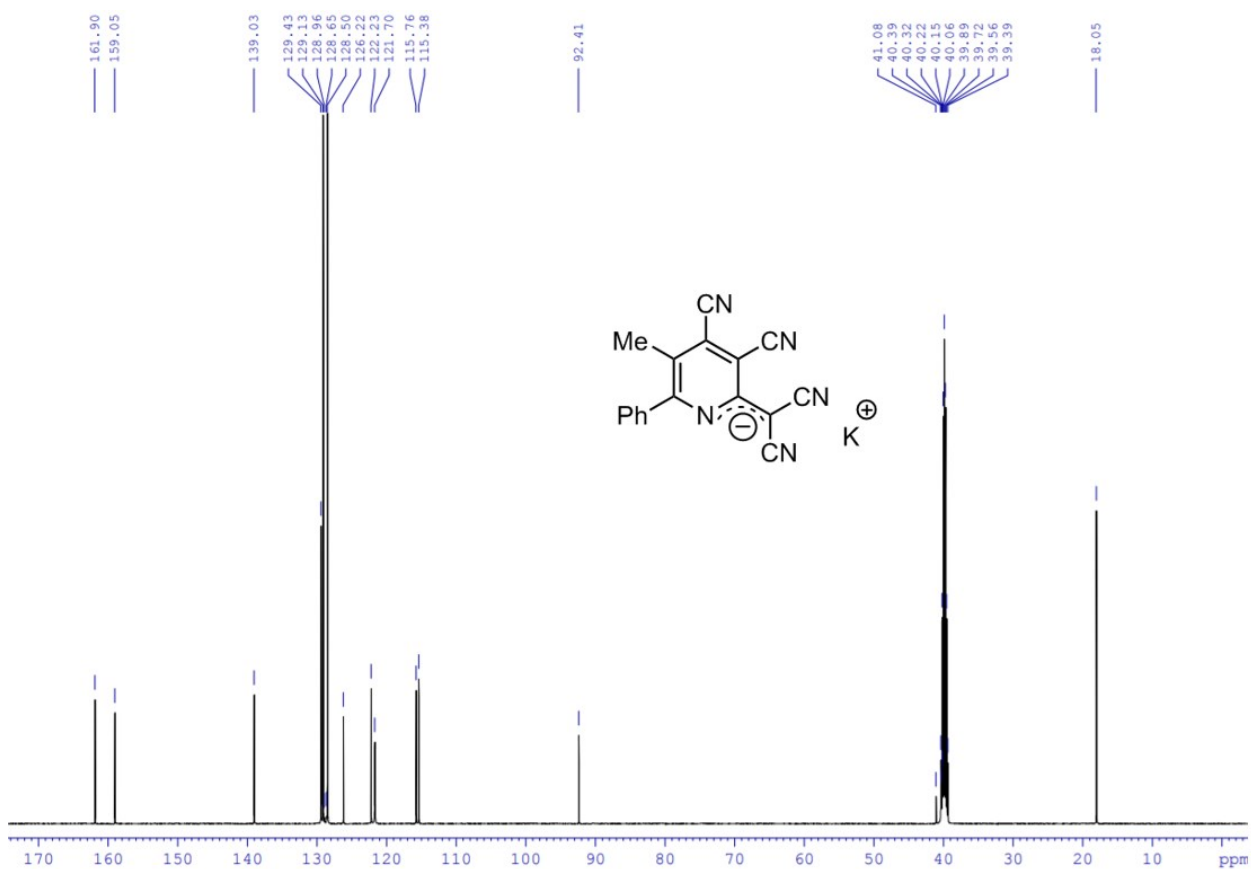

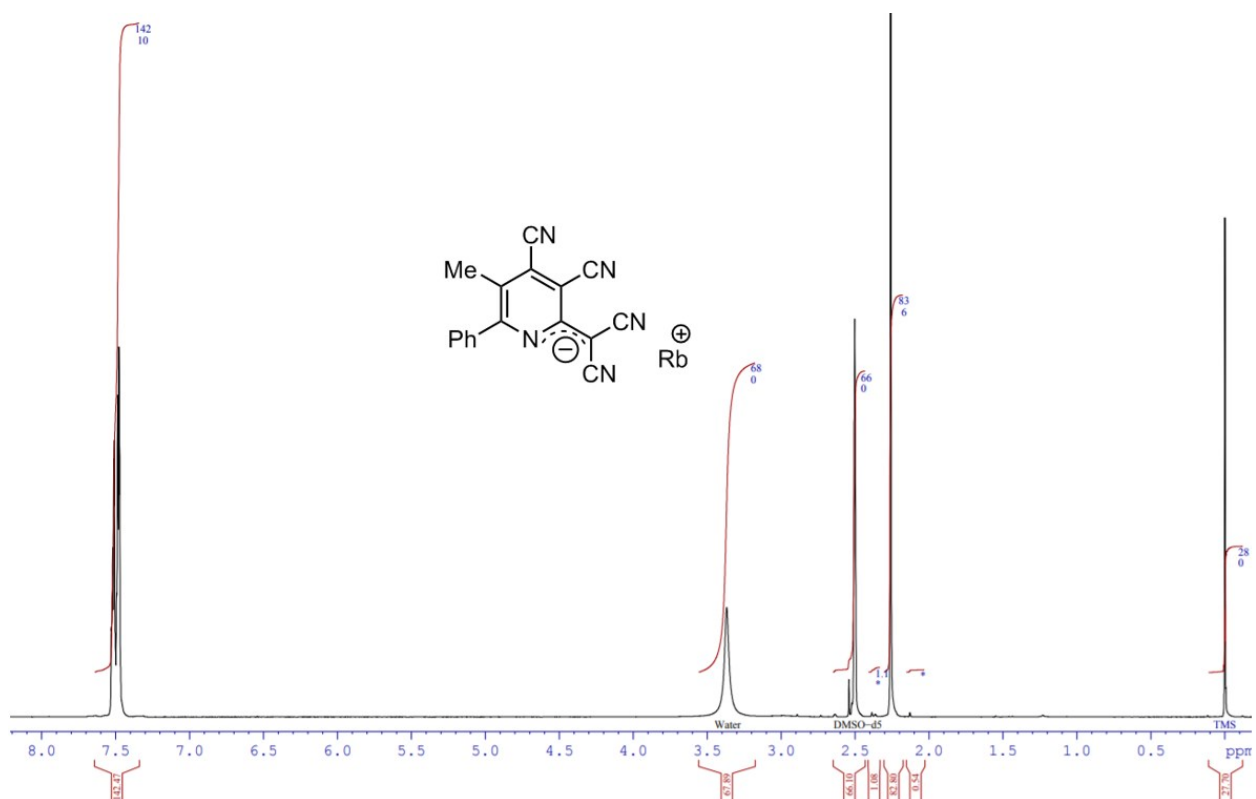

Figure S23  $^1\text{H}$  NMR-spectrum of **2d** (500.13 MHz,  $\text{DMSO-d}_6$ ).

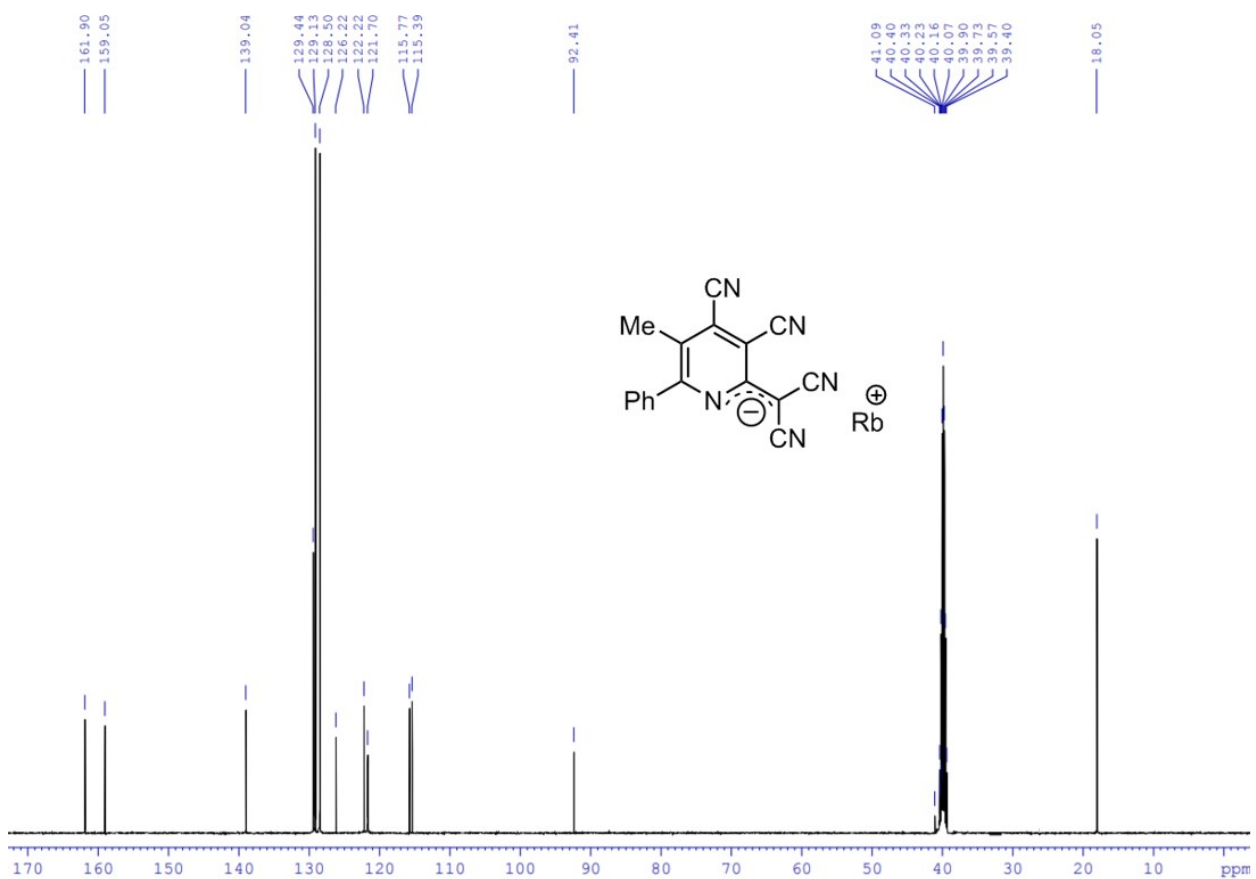

Figure S24  $^{13}\text{C}$  NMR-spectrum of **2d** (500.13 MHz,  $\text{DMSO-d}_6$ ).

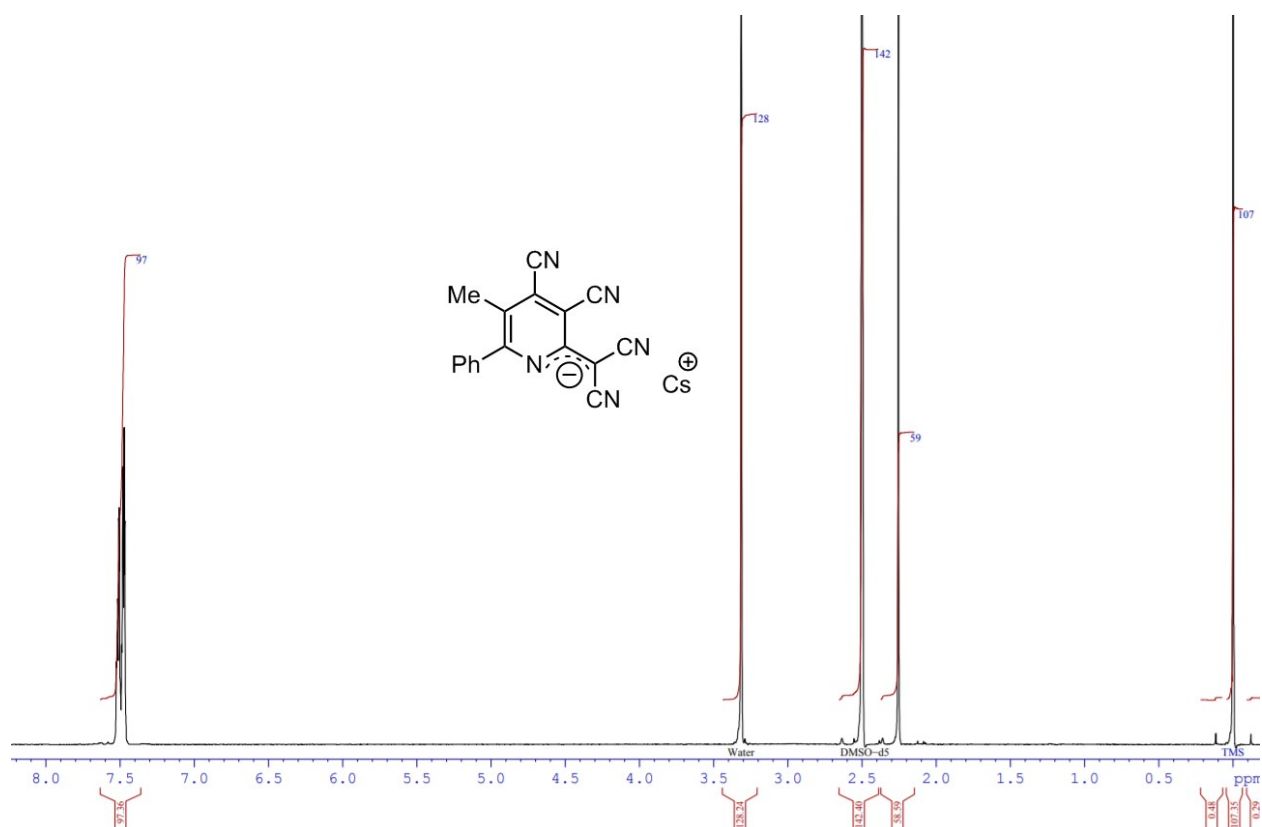

**Figure S25** <sup>1</sup>H NMR-spectrum of **2e** (500.13 MHz, DMSO-d<sub>6</sub>).

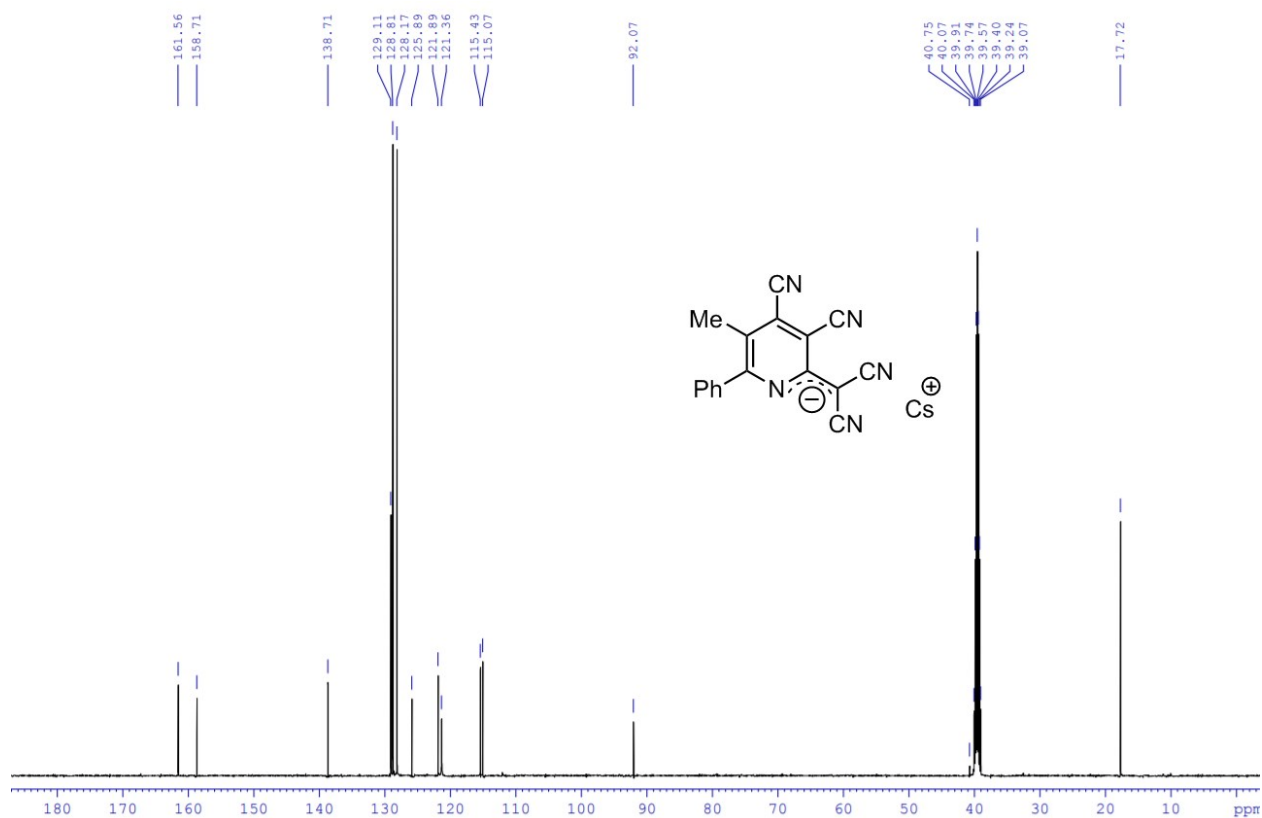

**Figure S26** <sup>13</sup>C NMR-spectrum of **2e** (500.13 MHz, DMSO-d<sub>6</sub>).
